# Supplementary material for: MCMBP promotes the assembly of the MCM2–7 hetero-hexamer to ensure robust DNA replication in human cells
Source: eLife journal article supplement (doi:10.7554/elife.77393), 2022-04-11

**Figure 1a**

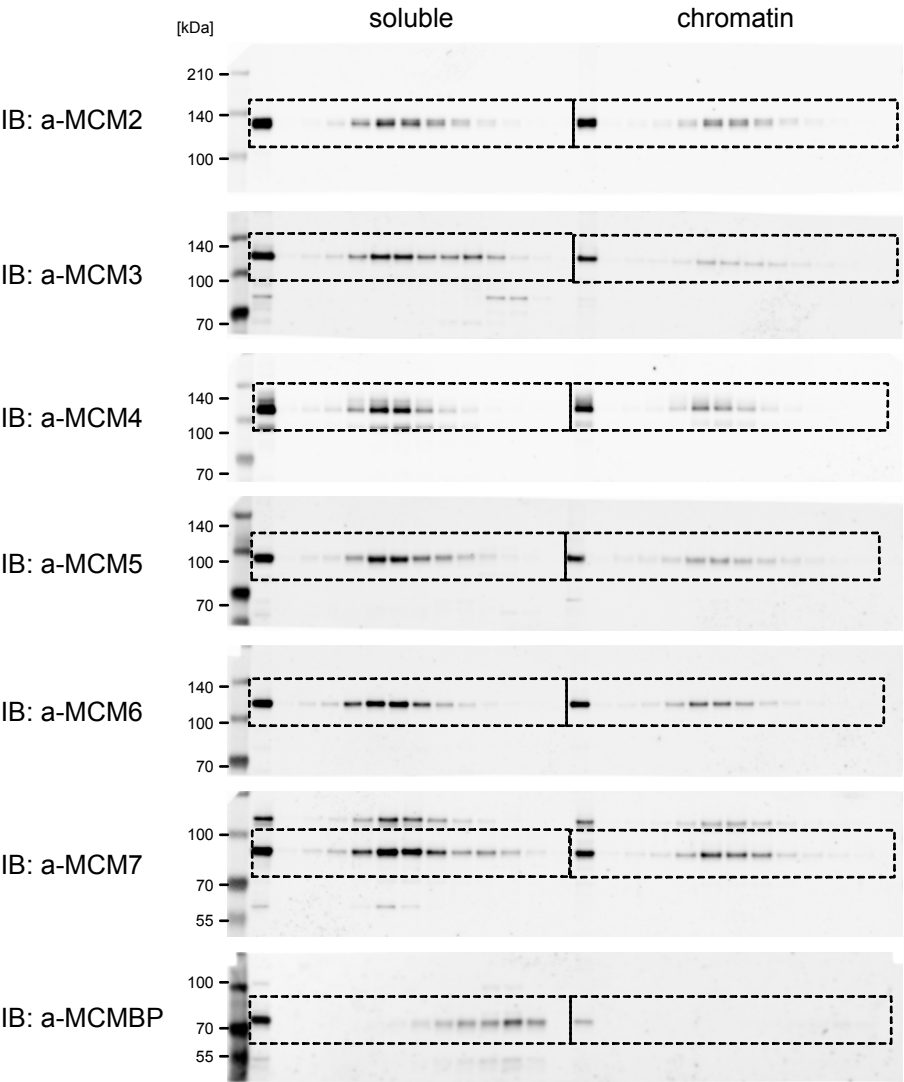

**Figure 1d**

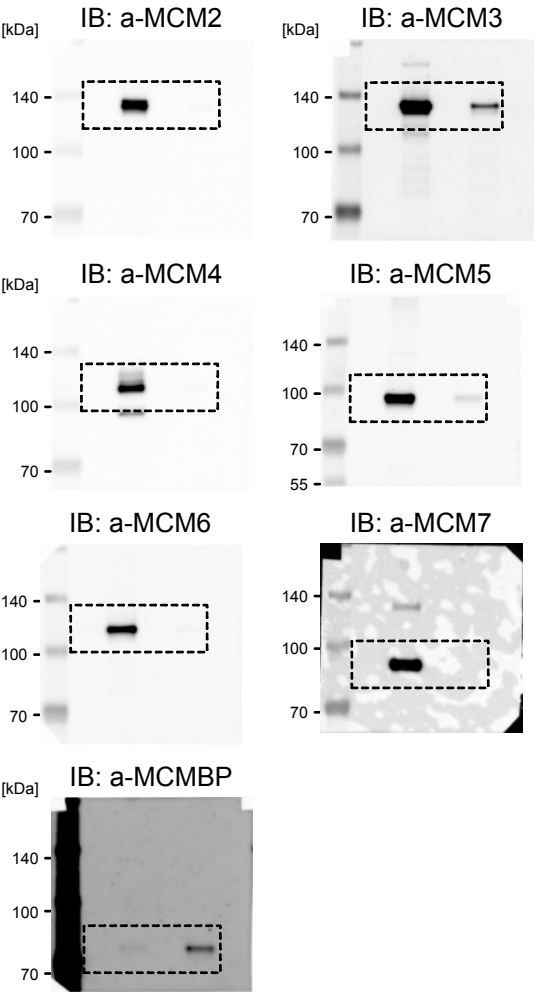

**Figure 1b**

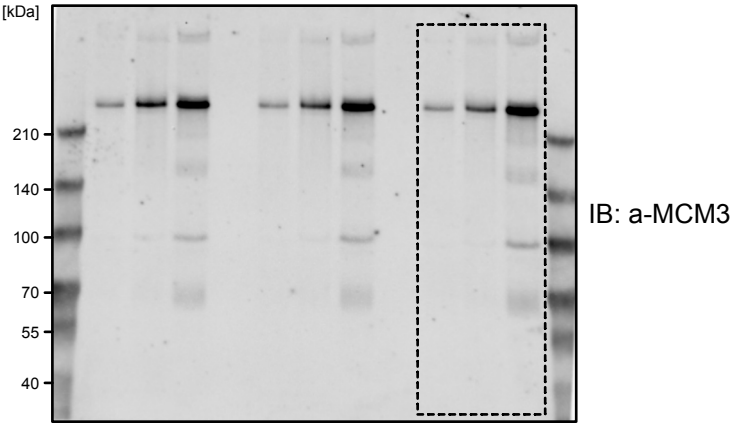

**Figure 2b**

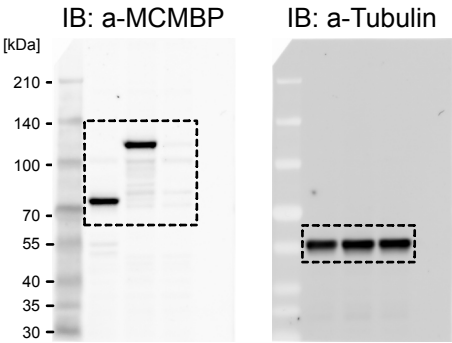

**Figure 2c**

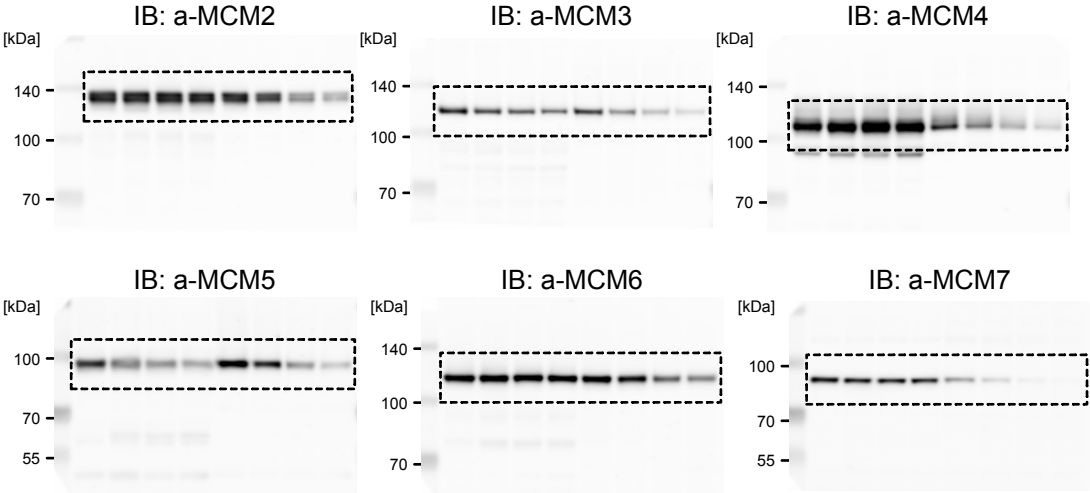

**Figure 2d**

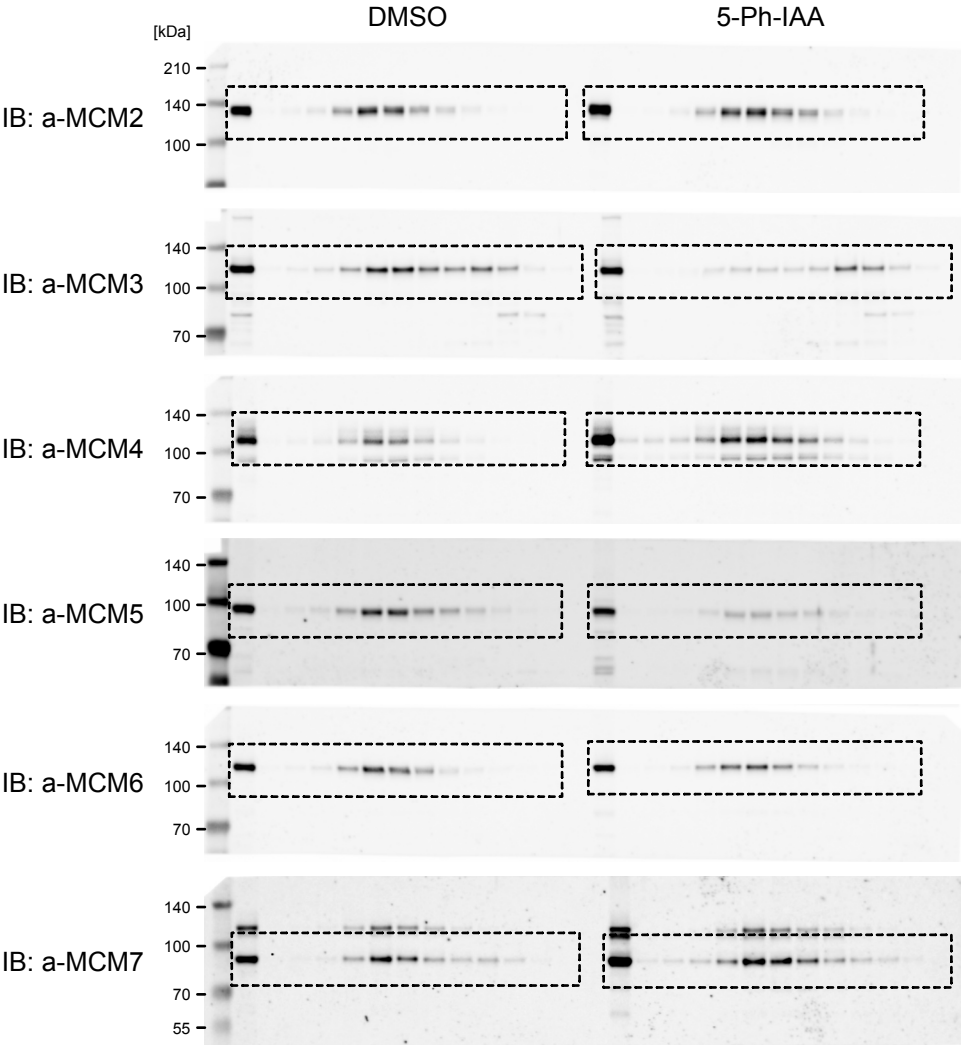

**Figure 3b**

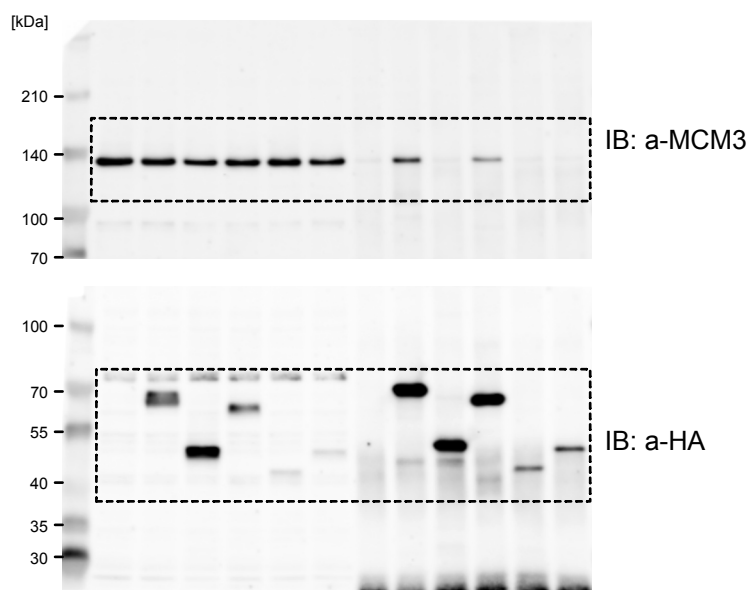

**Figure 3c**

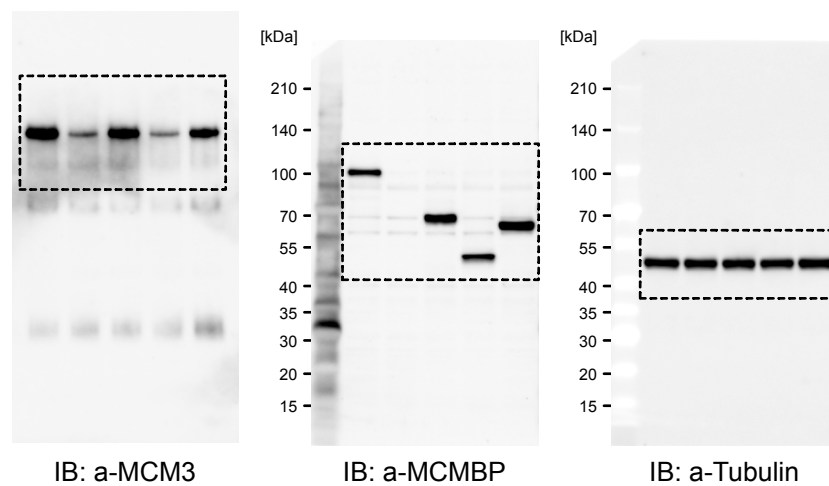

**Figure 4a**

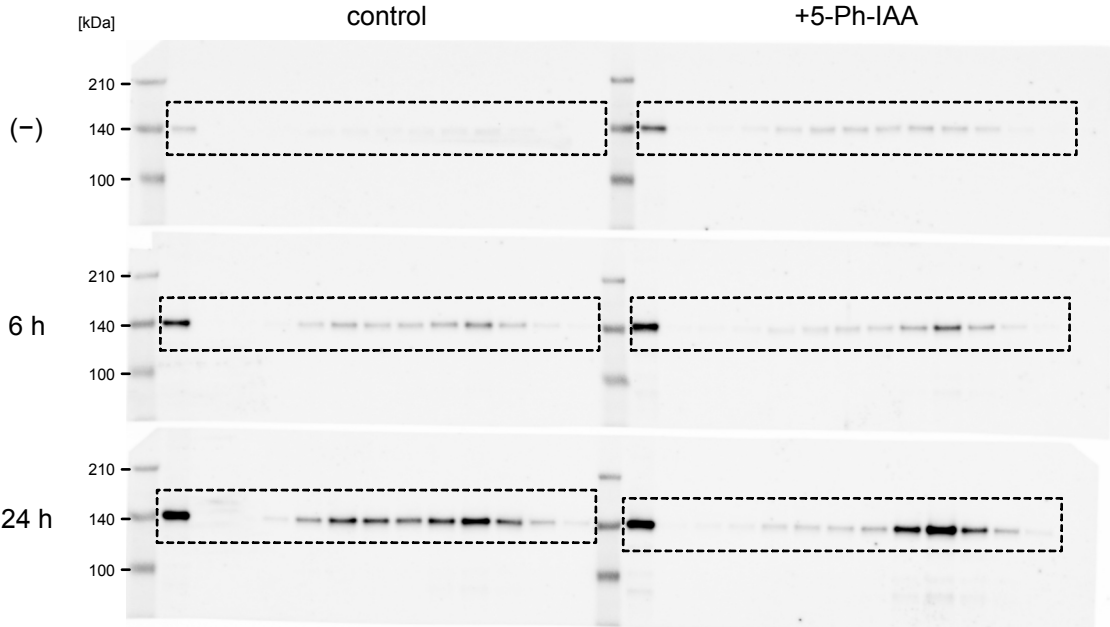

**Figure 4f**

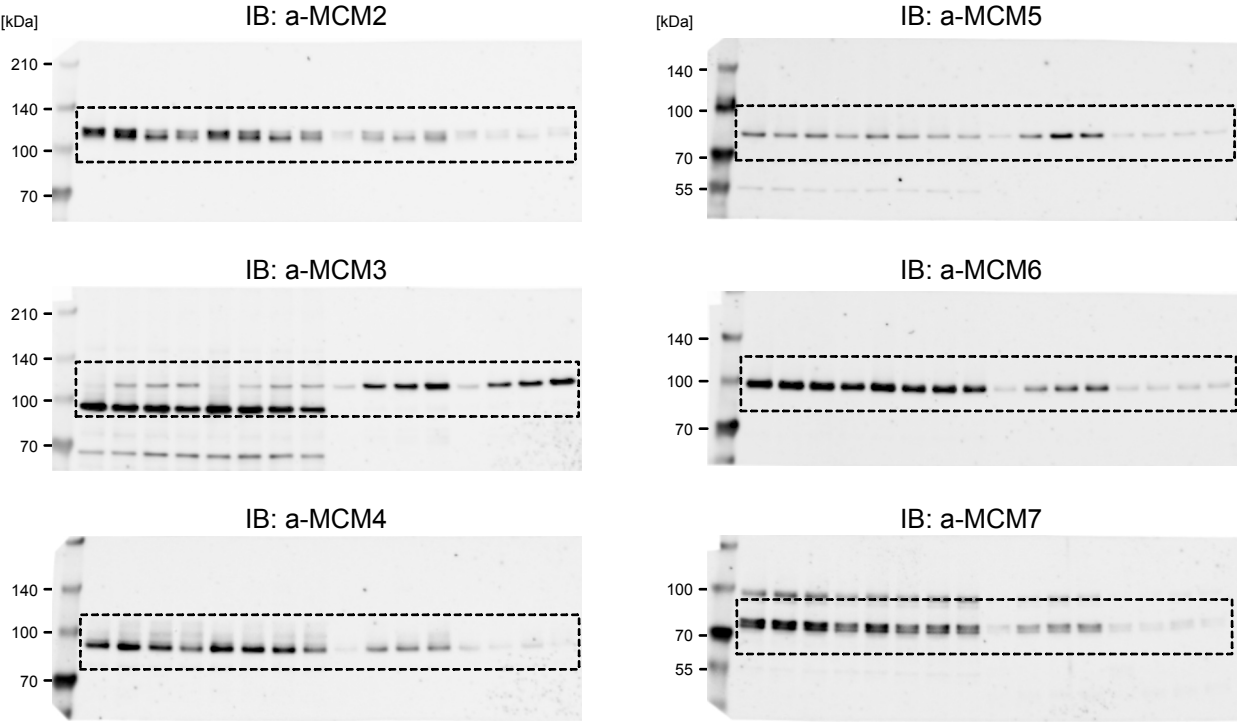

**Figure 1-figure supplement 1a**

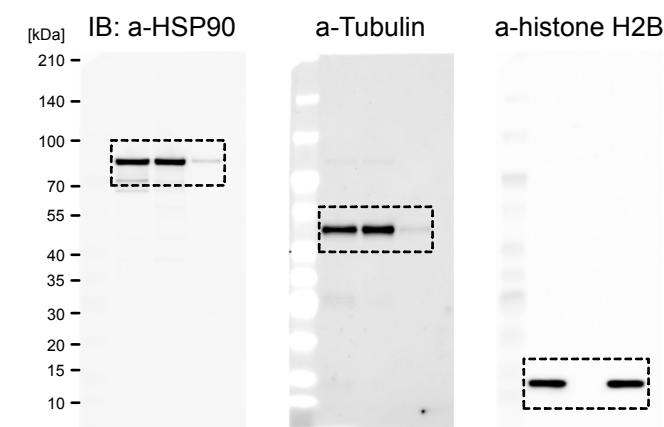

**Figure 1-figure supplement 1b**

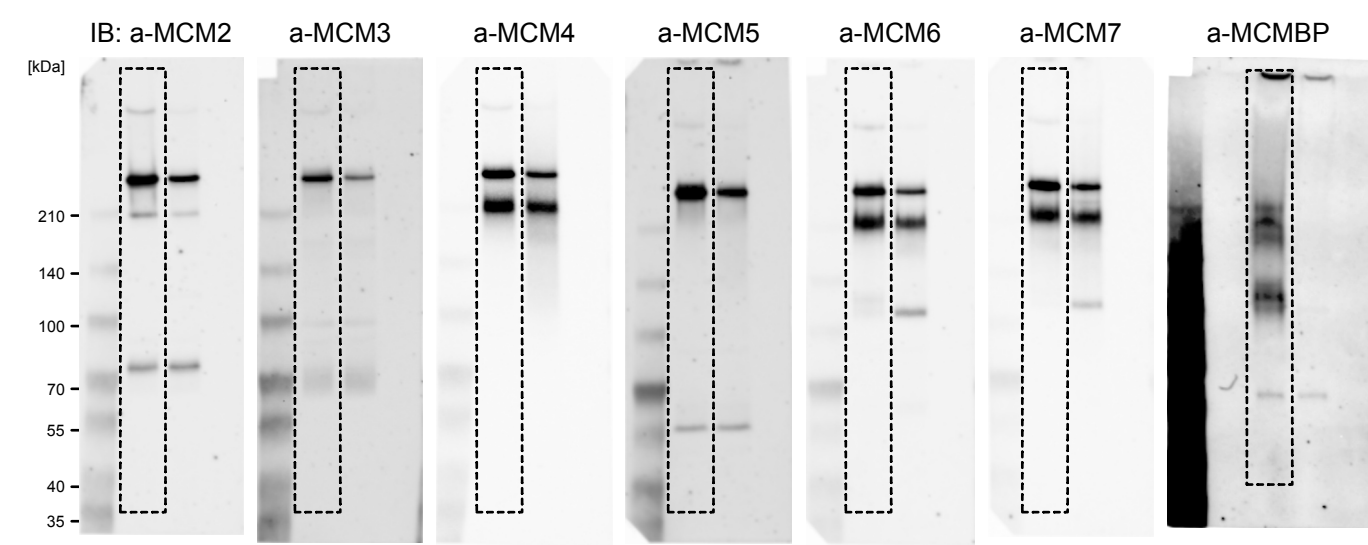

**Figure 1-figure supplement 1c**

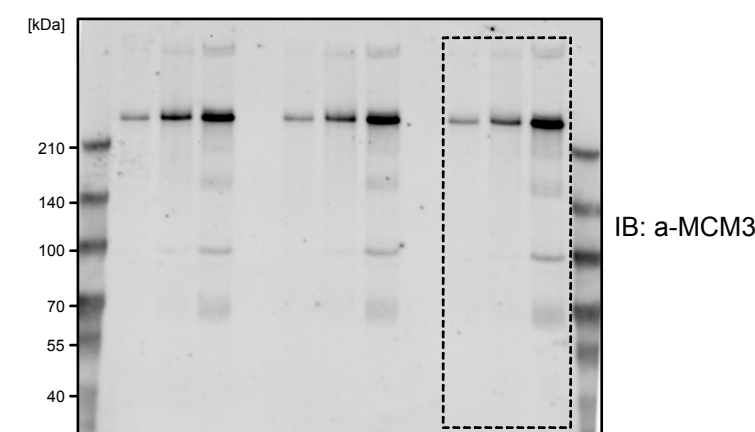

**Figure 1-figure supplement 1d**

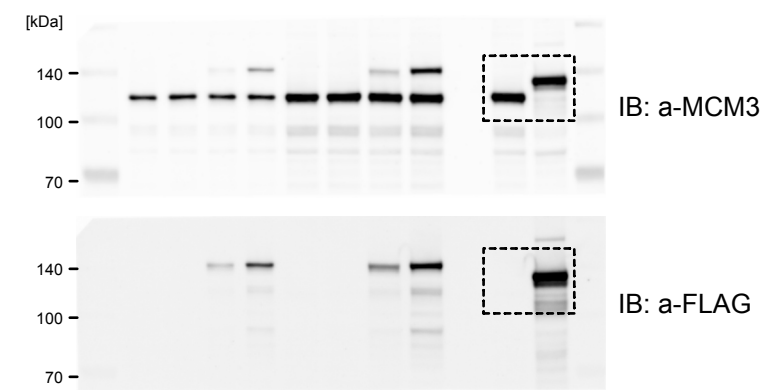

**Figure 1-figure supplement 1e**

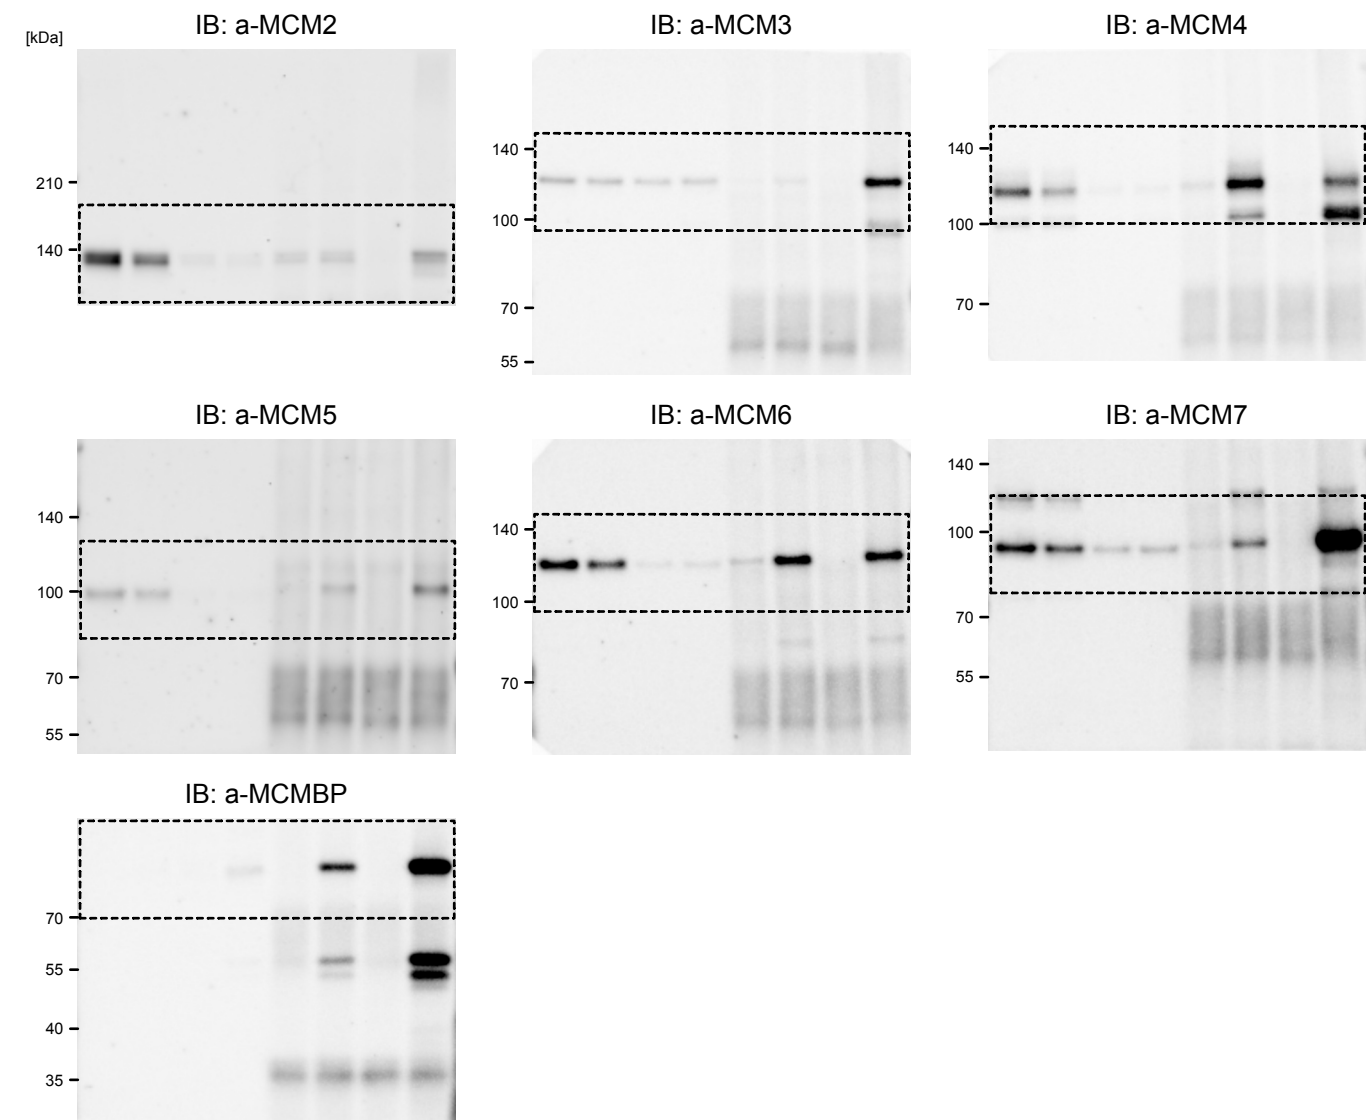

**Figure 2-figure supplement 1c**

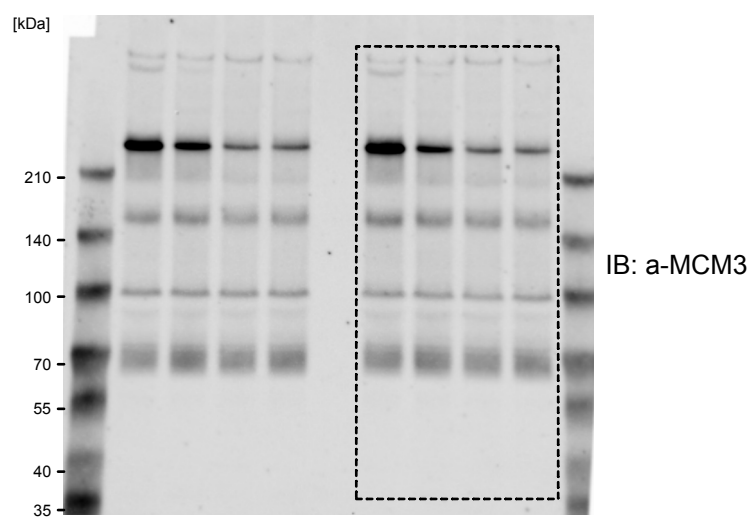

**Figure 3–figure supplement 1b**

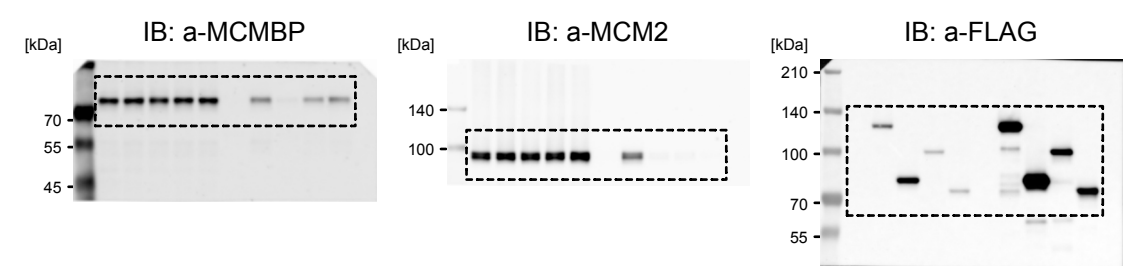



**Figure 4-figure supplement 1b**

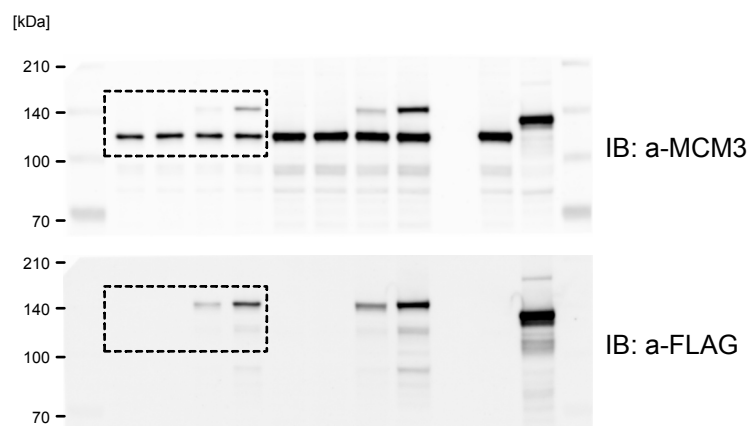

**Figure 4-figure supplement 1e**

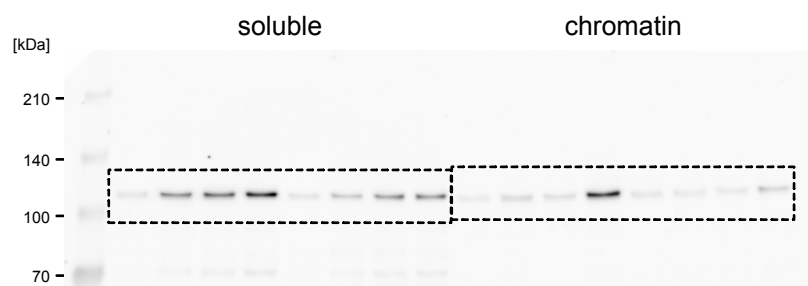

**Figure 4-figure supplement 2a**

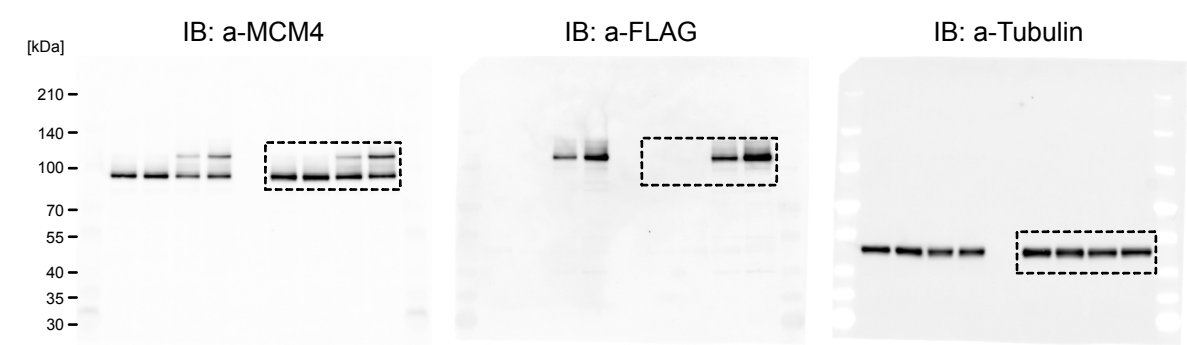

**Figure 4-figure supplement 2d**

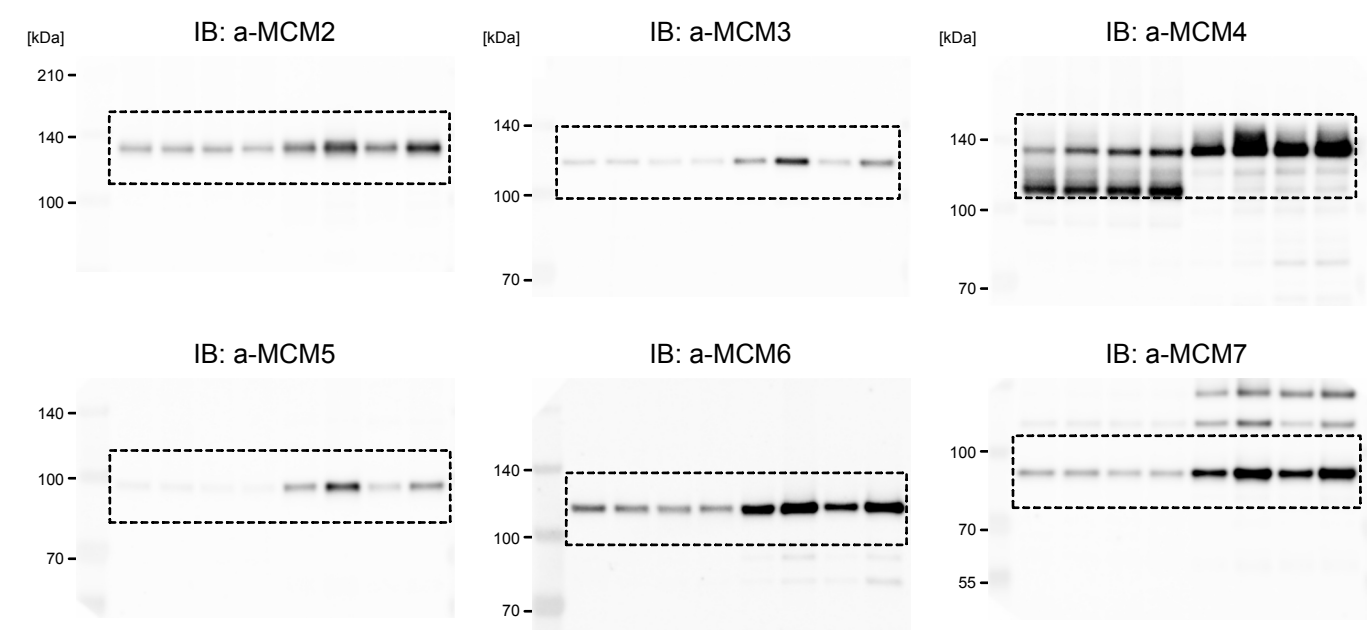

**Figure 5-figure supplement 1c**

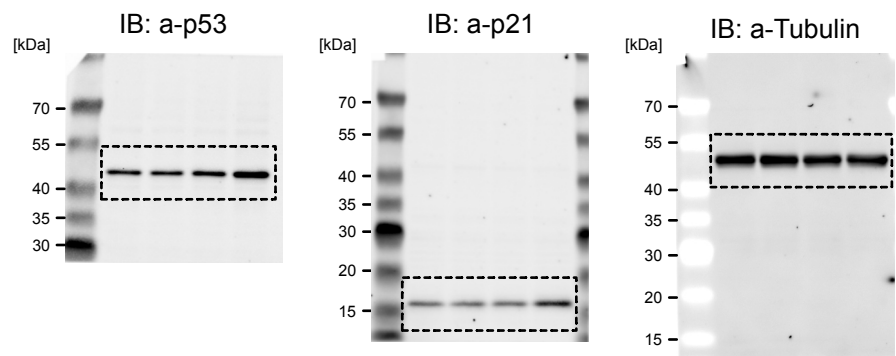

**Figure 5-figure supplement 1e**

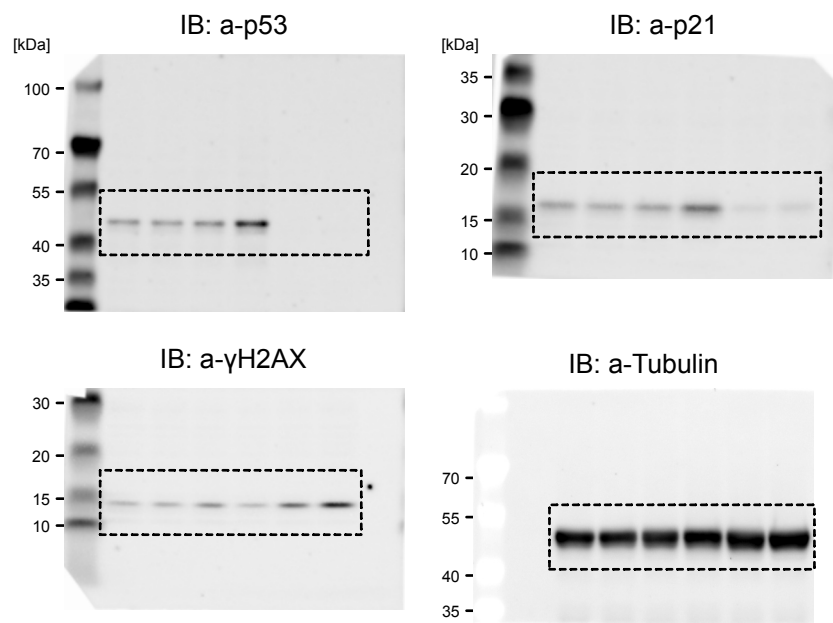

Supplement: data2 [file elife-77393-data2-v1.zip]
