# Supplementary material for: MCMBP promotes the assembly of the MCM2–7 hetero-hexamer to ensure robust DNA replication in human cells
Source: eLife. 2022 Apr 19;11:e77393. doi: 10.7554/eLife.77393 (PMC9018068; doi:10.7554/eLife.77393)
Supplement: Source data 1. [file elife-77393-data1.xlsx]

## Sheet: Figure 1a
Figure 1a. Band intensities of MCM2−7, and MCMBP after chromatography.
soluble	Fraction #	16-18	19-21	22-24	25-27	28-30	31-33	34-36	37-39	40-42	43-45	46-48	49-51
	MCM2	0	926.263	1935.58	8944.53	27377.9	24742.1	13231.7	4763.52	1778.75	0	0	0
	MCM3	0	398.607	1209.58	6626.63	20642.6	18464.4	9337.48	6865.34	12587.2	5207.15	831.092	0
	MCM4	0	540.021	1183.75	6878.58	28191.4	25457	7671.77	2105.48	442.607	0	0	0
	MCM5	0	610.607	1100.51	8217.02	28192.3	26804.3	14377.6	10232.3	5407.93	2116.16	0	0
	MCM6	0	707.263	1619.48	12650.6	25074.1	24781.2	12491.4	3696.54	1318.58	0	0	0
	MCM7	0	1832.99	5055	26414.1	55922.5	48328.6	27570.3	10953.7	9337.18	4432.07	1512.09	0
	MCM-BP	0	0	0	0	0	0	3929.13	9108.87	15823.9	17497	27450.4	15367.6
chromatin	Fraction #	16-18	19-21	22-24	25-27	28-30	31-33	34-36	37-39	40-42	43-45	46-48	49-51
	MCM2	0	584.364	1430.58	11545.1	24569	20535.9	10401.9	5570.25	1919.16	854.607	0	0
	MCM3	0	1030.75	1229.41	3261.1	13528.7	10443.8	7430.07	5011.8	2459.03	0	0	0
	MCM4	0	456.607	716.263	6631.63	29009.8	24692.4	11475.3	2909.62	742.849	0	0	0
	MCM5	0	2067.41	2403.48	6166.22	18320.5	19001.1	13073.8	7289.65	3922.69	1329.58	0	0
	MCM6	0	359.192	712.849	3816.83	9998.19	8646.53	4965.85	1264.58	359.192	0	0	0
	MCM7	0	601.021	1422.34	6988.87	25415.2	18920.6	11028.9	3449.96	953.263	0	0	0
	MCM-BP	0	0	0	0	0	0	0	0	0	0	1110.85	0

## Sheet: Figure 1c
Figure 1c. Band intensities of MCM3 in hexamer, subcomplexes and monomer sizes.
		hexamer	subcomplexes + monomer
soluble	#1	18965.6	8123.84
	#2	20718.2	9135.04
	#3	20387.4	10528.9
chromatin	#1	12470.3	295.778
	#2	10944.4	163.364
	#3	9987.31	198.364

## Sheet: Figure 2c
	Figure 2c. Band intensities of MCM2−7 after the depletion of MCMBP.
			soluble				chromatin
		days after +IAA	0	1	2	3	0	1	2	3
	MCM2	#1	45824	44810.3	44627.5	41801.5	38536.7	30701.3	17182.6	11250.1
		#2	38145.2	44145.5	43216.2	38661.7	25486.8	14539.1	6189.38	4173.82
		#3	46872.1	41758.3	40673.7	37800	21220.2	11976.1	6499.45	4532.06
	MCM3	#1	22555.5	15111.3	12724.8	10381.4	18207.8	9361.02	5376.27	2667.96
		#2	16170.8	11222.3	8580.89	8239.36	10247.6	5096.9	2390.89	2403.58
		#3	22380.5	11455.4	9260.19	6654.29	12970.3	6473.75	3957.96	2360.16
	MCM4	#1	35402.7	39249.7	42286.7	39167.4	22643	13257.5	6955.78	3744.96
		#2	31147.9	35006.5	37655.6	37049.8	18068.1	8521.15	3743.13	2354.16
		#3	34511.8	37249.6	38204.8	38254.6	19321.2	9705.34	4059.79	2359.58
	MCM5	#1	23532.7	17356.7	12627.9	10930.7	28978.3	20184.9	9447.55	4364.52
		#2	25967.1	18115.8	11876.4	8802.15	9643.67	6548.42	3081.23	2424.75
		#3	30312	21850.7	12832	10181.9	10787.9	5839.66	3028.65	2013.34
	MCM6	#1	28750	29252.1	29356.7	27468.5	27025.3	22189.1	13287.6	9300.04
		#2	23877.2	22994.5	18975.5	18980.5	14186.8	8005.65	4112.71	3045.03
		#3	21643.3	21386.4	22346.5	21028.7	13663.2	7797.94	4060.59	2783.62
	MCM7	#1	19056.2	18343.3	18029.7	16663.4	7806.82	2930.2	770.021	225.536
		#2	15898.2	16347.4	16053.4	12360.9	6043.1	2324.13	733.435	268.95
		#3	15024.7	15877	14286.7	11148.7	5266.85	1817.65	531.192	244.95

## Sheet: Figure 2d
Figure 2d. Band intensities of MCM2−7 after chromatography.
soluble	Fraction #	16-18	19-21	22-24	25-27	28-30	31-33	34-36	37-39	40-42	43-45	46-48	49-51
	MCM2	0	0	858.092	9078.09	23920.1	19598.2	9190.6	3423.62	1133.09	328.95	0	0
	MCM3	0	382.021	1572.06	5315.15	16837.3	16003.2	9507.43	7002.75	10289.2	5586.1	806.678	0
	MCM4	0	178.364	618.435	4635.42	14272.5	10520.8	4229.3	1323.16	706.607	0	0	0
	MCM5	0	492.021	1494.58	7157.82	21171.1	19849.5	10080.1	6480.41	2985.03	904.678	0	0
	MCM6	0	435.607	1021.34	7497.12	20361.3	14547	7926.6	2334.65	892.849	0	0	0
	MCM7	0	0	657.607	6847.58	25058.2	15389.5	6304.34	3222.2	3475.93	1814.99	157.95	0
	MCM-BP
chromatin	Fraction #	16-18	19-21	22-24	25-27	28-30	31-33	34-36	37-39	40-42	43-45	46-48	49-51
	MCM2	0	0	1132.26	6241.17	19761.4	24444.1	15401.7	9642.36	3056.3	504.192	0	0
	MCM3	0	0	424.95	1265.16	2466.03	2248.62	1710.72	2799.22	11942.6	8002.58	2144.79	0
	MCM4	1856.48	1569.41	2372.38	7627.24	18182.1	21367.8	14379.7	9511.36	3833	1153.34	0	0
	MCM5	0	0	567.778	1581.58	5296.73	5937.1	4024.52	2550.28	1135.09	0	0	0
	MCM6	0	0	525.435	5572.97	13453.6	17646.2	8995.12	3206.47	810.506	0	0	0
	MCM7	426.678	1316.75	2464.96	10148.3	30965.7	26336.3	14148.1	6186.58	3440.28	2029.82	864.021	0
	MCM-BP

## Sheet: Figure 3d
Figure 3d. Band intensities of MCM3 at the hexamer size.
	Untreat	control	FL	ΔN	ΔNLS
#1	53048.3	7206.7	42293	10315.9	40663.4
#2	49687.9	10006.1	46993.9	12798.4	43186.2
#3	44599	12641.9	43225.6	11194.4	36589.8

## Sheet: Figure 3e
Figure 3e. Growth curves of cells expressing the mutants of MCMBP.
		(−)
	days	0	2	4	6	8
MCMBP(+)	#1	7.68	7.84	7.1	7.7	7.7	×105 cells
	#2	6.91	7.08	7.6	7.54	7.2
	#3	7.08	6.91	8.1	8.2	8.2
MCMBP(−)	#1	7.68	6.65	4.7	3	0.88
	#2	6.91	6.31	5	2.4	0.9
	#3	7.08	5.94	5.5	2.4	0.88
		FL
	days	0	2	4	6	8
MCMBP(+)	#1	7.3	7.37	7.2	7.4	7.7	×105 cells
	#2	6.85	6.65	7.2	7.14	6.8
	#3	7.45	7.15	7.1	7.3	7.1
MCMBP(−)	#1	7.3	6.8	7.1	6.8	7
	#2	6.85	6.91	6.9	6.9	6.4
	#3	7.45	6.63	7	6.6	6.8
		ΔN
	days	0	2	4	6	8
MCMBP(+)	#1	7.38	7.18	7.8	8.2	8.2	×105 cells
	#2	6.93	6.73	7.2	7.1	7.9
	#3	7.48	7.48	7	7.6	7.6
MCMBP(−)	#1	7.38	5.94	5.1	3	1.6
	#2	6.93	6.32	5.1	2.85	1.3
	#3	7.48	6.37	5.3	3.3	1.1
		ΔNLS
	days	0	2	4	6	8
MCMBP(+)	#1	6.6	6.5	7	7	7.5	×105 cells
	#2	6.28	6.2	6.8	7.5	7
	#3	6.75	6.7	6.5	6.7	6.7
MCMBP(−)	#1	6.6	6.53	6.5	6.85	7.8
	#2	6.28	6.97	6.5	7	7
	#3	6.75	6.52	7.5	7.65	6.8

## Sheet: Figure 4c
Figure 4c. All DD-MCM3 intensity.
control				+ 5-Ph-IAA
G1/S	S	G2	next G1	G1/S	S	G2	next G1
0.00175984	-0.0252941	0.0604056	0.0606921	0.0153305	0.0656186	0.136078	0.107671
0.00191444	-0.0234352	0.117599	0.0657685	0.0223452	0.0774435	0.146837	0.109572
0.00469529	-0.0112278	0.163106	0.119373	0.02603	0.0806909	0.157228	0.151398
0.0195777	0.0286357	0.165581	0.133998	0.0276856	0.100201	0.166593	0.185654
0.0197702	0.0674774	0.172059	0.157958	0.0382423	0.108015	0.179846	0.318809
0.0223242	0.069162	0.187197	0.191207	0.0386164	0.130912	0.234122	0.319172
0.0237658	0.0750508	0.283652	0.218251	0.0513418	0.132822	0.245033	0.328138
0.0254311	0.0775225	0.287498	0.224276	0.0519964	0.133885	0.336139	0.346016
0.0261033	0.0798961	0.330035	0.240956	0.0544845	0.135139	0.361445	0.369966
0.0388404	0.0799838	0.35644	0.247561	0.055285	0.144731	0.379162	0.372735
0.058604	0.0945402	0.369129	0.248952	0.0603821	0.148777	0.47337	0.376413
0.0674526	0.103442	0.432689	0.310747	0.0611553	0.157657	0.504989	0.425472
0.0727017	0.110072	0.471872	0.314348	0.0651089	0.164721	0.505739	0.462036
0.0735211	0.114612	0.473554	0.353769	0.0666049	0.1779	0.542662	0.488551
0.0757114	0.118794	0.494992	0.36257	0.0670629	0.186015	0.611908	0.5854
0.0827594	0.124931	0.502823	0.386685	0.0677109	0.197704	0.639895	0.61756
0.0872093	0.130412	0.520359	0.391084	0.0682296	0.204734	0.671431	0.641971
0.0969528	0.136538	0.543162	0.405444	0.0711326	0.246423	0.671859	0.667605
0.108471	0.136857	0.719234	0.469985	0.0721258	0.262707	0.697388	0.826498
0.119959	0.143496	0.756549	0.486341	0.0765454	0.28009	0.70162	0.92415
0.121669	0.154757	0.85727	0.522568	0.0780854	0.292123	0.714169	0.931516
0.12809	0.156703	0.918047	0.529079	0.0796703	0.29448	0.723417	0.962043
0.144436	0.185378	0.97865	0.548537	0.0988755	0.297372	0.7335	1.00901
0.144951	0.210134	1.01403	0.602227	0.100986	0.297778	0.751457	1.01799
0.145634	0.220352	1.03594	0.629747	0.10909	0.305083	0.775372	1.06875
0.155924	0.224622	1.09136	0.657073	0.109925	0.30526	0.775525	1.08292
0.156087	0.251593	1.11364	0.733806	0.112123	0.317002	0.7783	1.08683
0.157609	0.2724	1.1679	0.739674	0.116025	0.344635	0.779752	1.0933
0.161366	0.274915	1.25432	0.788553	0.12162	0.348151	0.831924	1.11959
0.171047	0.278395	1.30657	0.843504	0.122836	0.353771	0.88029	1.12106
0.178638	0.282254	1.34099	0.847181	0.124485	0.406496	0.880754	1.13071
0.190225	0.304713	1.34556	0.86528	0.132469	0.411345	0.915325	1.16915
0.190906	0.340302	1.38261	0.868846	0.137523	0.420488	0.965067	1.17872
0.196471	0.348866	1.46917	0.928616	0.147824	0.420987	0.967942	1.23413
0.197256	0.375516	1.53343	1.08361	0.162422	0.42903	0.993251	1.25285
0.203552	0.414918	1.59708	1.11484	0.169063	0.454211	1.0069	1.30546
0.220704	0.429956	1.62474	1.12857	0.16971	0.506744	1.03655	1.41908
0.22332	0.434402	1.62575	1.28586	0.177317	0.52272	1.05456	1.4609
0.224357	0.516521	1.67138	1.32884	0.178762	0.586227	1.05956	1.50429
0.226922	0.625061	1.67642	1.33652	0.178875	0.589179	1.06474	1.62036
0.23171	0.655544	1.68422	1.36026	0.190179	0.599171	1.06657	1.6225
0.239031	0.681466	1.68699	1.37814	0.194461	0.602311	1.0907	1.65039
0.240482	0.758795	1.81567	1.38794	0.212036	0.669647	1.12909	1.8053
0.248851	0.905928	1.84493	1.41833	0.225312	0.681182	1.1601	1.82285
0.30028	0.906865	1.85151	1.45906	0.231381	0.739495	1.16775	1.82946
0.319	0.965919	1.88719	1.59936	0.239696	0.770289	1.17028	1.85878
0.321219	0.970569	1.90925	1.64666	0.244476	0.831831	1.19054	1.86586
0.339628	1.003	1.94825	1.66365	0.2498	0.842118	1.2009	1.88344
0.343867	1.08061	2.14532	1.67233	0.255323	0.849494	1.20526	1.92644
0.352144	1.09521	2.15951	1.70721	0.256003	0.851798	1.2089	1.97031
0.35439	1.09709	2.18416	1.71279	0.2568	0.852034	1.2479	1.97235
0.358051	1.10772	2.19178	1.71407	0.267809	0.858103	1.44918	1.97907
0.380657	1.12517	2.19682	1.7344	0.286462	0.859272	1.44987	2.02903
0.387192	1.12522	2.21094	1.75299	0.304158	0.860094	1.46865	2.09324
0.394335	1.16184	2.22557	1.75618	0.309996	0.890722	1.46931	2.13063
0.399231	1.20669	2.24372	1.78063	0.310605	0.912538	1.46956	2.15742
0.399528	1.21036	2.25558	1.91473	0.312698	0.919996	1.47352	2.16452
0.409033	1.21042	2.28528	1.92834	0.320148	0.938645	1.48124	2.19032
0.429308	1.22498	2.29609	2.00316	0.328911	0.94731	1.4842	2.26623
0.432725	1.24293	2.31188	2.00828	0.332698	0.958204	1.50422	2.28045
0.435657	1.25812	2.33899	2.07189	0.334813	0.984184	1.52285	2.28687
0.449261	1.26162	2.42886	2.16348	0.354852	0.999513	1.53178	2.33795
0.452787	1.27745	2.45764	2.16778	0.371151	1.03426	1.56986	2.34924
0.464172	1.33714	2.46688	2.27812	0.372271	1.05215	1.60357	2.42711
0.471002	1.35876	2.51723	2.31591	0.375541	1.1014	1.6088	2.47533
0.473807	1.38181	2.52309	2.31716	0.378871	1.11241	1.6516	2.50079
0.474301	1.41415	2.53817	2.3303	0.388498	1.13075	1.67878	2.50928
0.477561	1.44371	2.54738	2.3515	0.396729	1.14203	1.68937	2.51646
0.47797	1.46132	2.61149	2.37892	0.41514	1.14293	1.71629	2.51657
0.492023	1.46726	2.62034	2.38764	0.416487	1.18278	1.71931	2.54904
0.497461	1.47751	2.69725	2.40148	0.441394	1.24425	1.71942	2.55205
0.50271	1.51251	2.72427	2.41776	0.444099	1.25473	1.72462	2.56139
0.513805	1.52105	2.73855	2.43248	0.446924	1.26042	1.7393	2.56217
0.514989	1.52362	2.81963	2.47542	0.453521	1.29035	1.77483	2.56737
0.53069	1.52527	2.90038	2.55056	0.463022	1.29432	1.78583	2.58539
0.536896	1.56172	2.9052	2.57886	0.467453	1.32302	1.79021	2.58747
0.550597	1.58539	2.92951	2.67896	0.46999	1.32859	1.79344	2.59796
0.576879	1.5903	2.9882	2.68494	0.470222	1.36188	1.82218	2.60155
0.580398	1.59177	3.00805	2.70867	0.472239	1.36835	1.83876	2.62413
0.590932	1.59512	3.0128	2.73405	0.491539	1.36898	1.851	2.66153
0.607201	1.6123	3.01394	2.7624	0.50151	1.38303	1.87336	2.68765
0.610077	1.62602	3.02954	2.76265	0.510479	1.38956	1.93554	2.68848
0.616573	1.65536	3.04889	2.83029	0.510829	1.3963	1.93634	2.71334
0.61889	1.65569	3.07004	2.84541	0.518328	1.4056	2.00135	2.72258
0.649358	1.66844	3.13095	2.85037	0.521042	1.44841	2.00767	2.74605
0.654674	1.67843	3.15404	2.85286	0.52625	1.47016	2.01	2.77171
0.655699	1.73697	3.17627	2.87632	0.529792	1.47426	2.01924	2.80525
0.671416	1.75324	3.17938	2.90644	0.534299	1.5136	2.05244	2.89453
0.67837	1.77428	3.18404	3.07388	0.544623	1.5237	2.08772	2.90523
0.681989	1.78427	3.19254	3.11474	0.547771	1.53653	2.18363	2.91259
0.68551	1.78758	3.29757	3.16472	0.548021	1.54228	2.19162	2.91943
0.6932	1.79011	3.33617	3.17845	0.552839	1.66491	2.20125	2.92961
0.707645	1.79968	3.38036	3.2992	0.553052	1.6957	2.26786	2.95988
0.741247	1.8092	3.4503	3.40052	0.563616	1.7057	2.27025	2.98674
0.746241	1.82499	3.46995	3.40966	0.574036	1.7132	2.34346	3.02034
0.752749	1.82522	3.49019	3.41184	0.579172	1.71813	2.41517	3.03121
0.763775	1.83108	3.58496	3.47686	0.594202	1.72639	2.44105	3.05535
0.786227	1.83791	3.59234	3.56318	0.595866	1.77545	2.44628	3.07887
0.796943	1.85136	3.59567	3.56569	0.603881	1.78575	2.4586	3.09744
0.80714	1.85307	3.61476	3.56929	0.608271	1.8891	2.46517	3.13209
0.807546	1.86799	3.64847	3.57553	0.613621	1.90957	2.48263	3.29673
0.811422	1.86951	3.67388	3.57703	0.614771	1.93752	2.52864	3.34332
0.814142	1.89009	3.71683	3.61053	0.629038	1.97909	2.54741	3.36569
0.831406	1.90374	3.72812	3.61695	0.630524	2.04642	2.57479	3.52973
0.837181	1.93613	3.82315	3.75626	0.639788	2.05711	2.58918	3.56763
0.84026	1.98853	3.82769	3.8508	0.643753	2.106	2.59892	3.69695
0.842869	2.00666	3.88613	3.85625	0.64401	2.14415	2.61222	3.71764
0.847042	2.06117	3.89591	3.89594	0.665437	2.16535	2.61553	3.71922
0.847776	2.06704	3.926	3.93391	0.680079	2.17382	2.62101	3.72553
0.854247	2.06917	3.93056	3.94641	0.691039	2.17505	2.65223	3.75187
0.86043	2.10967	3.98827	3.98612	0.700353	2.19607	2.66908	3.77285
0.87177	2.12276	4.09675	3.98657	0.711872	2.20449	2.70679	3.79713
0.872738	2.17799	4.12547	4.22064	0.722549	2.21278	2.7077	3.80189
0.879952	2.18897	4.16968	4.22219	0.73293	2.22146	2.74719	3.85567
0.889865	2.20388	4.23707	4.38266	0.738259	2.23824	2.74822	3.86253
0.890651	2.21737	4.33274	4.39879	0.768101	2.24063	2.81693	3.8673
0.903687	2.2304	4.45143	4.41327	0.777311	2.2496	2.81814	3.92041
0.923454	2.24372	4.47512	4.46313	0.789191	2.25362	2.83287	3.92647
0.930212	2.2656	4.53654	4.50489	0.79583	2.26529	2.87622	3.94132
0.946928	2.30814	4.54245	4.51183	0.808681	2.2792	2.88537	3.96456
0.950777	2.34841	4.60009	4.59782	0.816461	2.28869	2.91054	3.97672
0.958902	2.3844	4.62665	4.65011	0.820973	2.2921	2.91998	4.15944
0.9611	2.40099	4.70165	4.72862	0.823691	2.3059	2.94963	4.23397
0.962129	2.41949	4.72507	4.73634	0.825486	2.31303	2.97225	4.34582
0.962656	2.43711	4.72514	4.78344	0.829808	2.33092	2.98589	4.37548
0.976921	2.45416	4.84468	4.79234	0.83042	2.37114	3.01909	4.38079
0.981987	2.48531	4.84924	4.8604	0.832795	2.39004	3.04312	4.46084
0.987906	2.48875	4.88755	4.86336	0.837162	2.41387	3.05723	4.5016
0.991164	2.52271	4.92801	4.88898	0.844842	2.41875	3.08314	4.51302
0.991481	2.5437	4.96264	4.90115	0.856657	2.44757	3.10044	4.78414
0.997106	2.59271	4.97302	4.90983	0.865181	2.45134	3.12934	4.8393
1.01416	2.61169	4.98751	4.96467	0.866025	2.47998	3.13201	4.8513
1.01837	2.62466	5.06966	4.97041	0.867237	2.50145	3.1536	4.87466
1.02033	2.62831	5.10705	5.04672	0.872221	2.50231	3.17585	4.9315
1.02519	2.63726	5.12181	5.05656	0.880956	2.54412	3.22521	4.95131
1.03122	2.68891	5.22562	5.06552	0.883492	2.56435	3.24143	5.00988
1.04407	2.74931	5.24	5.08323	0.896667	2.56795	3.24579	5.07131
1.05135	2.83885	5.24075	5.20306	0.904291	2.64358	3.27512	5.12783
1.05987	2.84157	5.24677	5.36334	0.907229	2.67895	3.33629	5.18861
1.07562	2.93435	5.35238	5.38478	0.917883	2.69274	3.33649	5.19562
1.07662	2.94226	5.40615	5.39317	0.9182	2.71246	3.34602	5.25876
1.07965	2.969	5.41112	5.4015	0.927017	2.71991	3.38894	5.30525
1.08231	3.0228	5.44108	5.44373	0.928157	2.77011	3.40303	5.33604
1.09623	3.09686	5.48196	5.46568	0.934526	2.78027	3.41405	5.3467
1.11946	3.14368	5.56788	5.54034	0.939434	2.78626	3.45485	5.34825
1.12238	3.1637	5.69571	5.54157	0.941077	2.78643	3.52068	5.40673
1.12461	3.18971	5.78869	5.57419	0.943989	2.80181	3.524	5.48627
1.1487	3.20067	5.82493	5.59411	0.96605	2.80981	3.52515	5.53375
1.17592	3.24732	5.91287	5.70796	0.967882	2.83791	3.53849	5.56208
1.20062	3.27046	6.05692	5.75839	0.973628	2.85094	3.55089	5.67081
1.20313	3.31427	6.06237	5.76267	0.978535	2.85277	3.55171	5.71832
1.21345	3.34398	6.06419	5.79527	0.980968	2.85467	3.5946	5.72532
1.22512	3.34852	6.06419	5.86873	0.981325	2.88499	3.69489	5.87043
1.22967	3.36722	6.12842	5.94784	0.986578	2.90191	3.70153	5.88034
1.23097	3.38665	6.25688	5.97154	1.0054	2.91604	3.71168	5.93196
1.23377	3.42797	6.25688	6.05213	1.01794	2.91921	3.86426	5.97323
1.25162	3.51573	6.32111	6.18059	1.01916	2.92056	3.89345	5.98036
1.25251	3.51803	6.38534	6.18059	1.02567	2.9482	3.90889	6.1921
1.28806	3.52125	6.38534	6.24482	1.02574	3.02001	3.91899	6.32056
1.30021	3.54864	6.38534	6.43751	1.02645	3.0381	3.98805	6.38479
1.30289	3.55709	6.44957	6.50174	1.03209	3.0441	4.03261	6.44902
1.32062	3.5953	6.5138	6.6302	1.03532	3.04657	4.03713	6.57748
1.32543	3.6418	6.5138	6.95135	1.04008	3.04926	4.04346	6.57748
1.34499	3.66561	6.5138	6.95135	1.06486	3.05246	4.05239	6.77017
1.34827	3.7327	6.57803	6.95135	1.06658	3.08146	4.0915	6.96286
1.36809	3.74355	6.57803	6.95135	1.06776	3.11381	4.1506	6.96286
1.36981	3.74999	6.57803	6.95135	1.07794	3.17994	4.22108	7.02709
1.37353	3.8542	6.57803	7.07981	1.09276	3.20453	4.26351	7.02709
1.38615	3.95434	6.57803	7.20827	1.11064	3.22227	4.28018	7.09132
1.40188	3.96763	6.64226	7.2725	1.11221	3.25341	4.31355	7.09132
1.41641	3.9734	6.70649	7.33673	1.11802	3.31138	4.33807	7.15555
1.43408	4.02515	6.70649	7.33673	1.12111	3.35457	4.37046	7.21978
1.48053	4.08714	6.83495	7.46519	1.13008	3.35879	4.50336	7.34824
1.489	4.09423	6.89918	7.46519	1.14262	3.41544	4.52567	7.34824
1.4974	4.13213	6.89918	7.46519	1.14719	3.49091	4.5882	7.60516
1.51947	4.22239	6.89918	7.59365	1.14813	3.49136	4.61794	7.60516
1.51947	4.24508	6.96341	7.59365	1.16465	3.50915	4.62411	7.66939
1.52359	4.32826	6.96341	7.72211	1.17579	3.53372	4.6249	7.73362
1.53373	4.32879	6.96341	7.72211	1.18627	3.54813	4.63611	7.73362
1.53922	4.37553	7.02764	7.85057	1.19581	3.55879	4.66715	7.73362
1.54477	4.52139	7.1561	7.85057	1.19796	3.56479	4.68699	7.79785
1.55119	4.74503	7.28456	7.9148	1.2037	3.57518	4.68922	7.92631
1.62646	4.77169	7.34879	8.04326	1.20961	3.63199	4.73968	8.119
1.66436	4.79595	7.47725	8.04326	1.21282	3.64748	4.77893	8.3117
1.66466	4.82448	7.60571	8.17172	1.23271	3.65103	4.78312	8.44016
1.66777	4.85704	7.60571	8.23595	1.23465	3.71447	4.8154	8.44016
1.67415	4.87471	7.66994	8.49287	1.26496	3.74015	4.86952	8.50439
1.68392	4.87857	7.66994	8.49287	1.27214	3.78572	4.90219	8.56862
1.69859	4.95831	7.66994	8.62133	1.27698	3.81346	4.94132	8.76131
1.75864	5.06329	7.92686	8.68556	1.28734	3.8337	4.97202	8.82554
1.78711	5.08481	7.99109	8.74979	1.29196	3.88528	5.14891	8.82554
1.79585	5.10725	8.05532	8.74979	1.29802	3.93331	5.22071	9.01823
1.80541	5.22436	8.11955	8.87825	1.29862	3.98098	5.22247	9.14669
1.90367	5.28936	8.18378	9.00671	1.30055	4.01617	5.30126	9.21092
1.93462	5.29023	8.18378	9.00671	1.32325	4.09272	5.32647	9.21092
1.93611	5.29075	8.24801	9.07094	1.32744	4.19923	5.36216	9.5963
1.93802	5.33034	8.24801	9.32787	1.33714	4.20924	5.4028	9.72476
1.95284	5.45139	8.31224	9.32787	1.34505	4.2098	5.48041	9.72476
2.03833	5.50168	8.37647	9.3921	1.34512	4.22672	5.48044	9.91745
2.13024	5.69253	8.37647	9.52056	1.34777	4.23408	5.52191	10.2386
2.14063	5.72368	8.50493	9.58479	1.34904	4.26917	5.55761	10.3028
2.16837	5.82481	8.95454	9.71325	1.3718	4.28707	5.77636	10.4313
2.17056	5.93493	9.083	9.77748	1.37499	4.37515	5.85627	10.4313
2.18462	5.94914	9.14723	9.90594	1.38686	4.39911	5.86961	10.624
2.28263	5.99132	9.14723	9.90594	1.38702	4.45966	5.91279	10.8167
2.29901	6.02881	9.2757	9.97017	1.38762	4.53132	5.9746	10.8167
2.31192	6.04434	9.2757	10.2913	1.40829	4.57317	5.97492	10.8809
2.31803	6.08743	9.40416	10.3555	1.40936	4.61113	6.0625	10.9451
2.35945	6.16213	9.46839	10.3555	1.40976	4.63875	6.12673	11.0736
2.37444	6.29059	9.46839	10.3555	1.41575	4.66142	6.12673	11.3305
2.39388	6.41905	9.66108	10.3555	1.42039	4.66379	6.19096	11.5874
2.41489	6.54751	10.2391	10.4198	1.44503	4.67486	6.19096	11.6517
2.4284	6.80443	10.2391	10.484	1.46715	4.73614	6.19096	11.6517
2.46179	6.80443	10.3034	10.6125	1.47347	4.77461	6.19096	11.7159
2.46997	6.86866	10.3676	10.8694	1.48756	4.81157	6.19096	11.7801
2.5976	6.86866	10.4961	10.9978	1.49993	4.90578	6.25519	11.9728
2.61009	6.86866	10.6245	11.0621	1.50033	4.92712	6.25519	12.1013
2.63049	7.12558	10.753	11.0621	1.50754	5.00934	6.25519	12.3582
2.74848	7.25404	11.2668	11.1263	1.50862	5.0454	6.31942	12.6151
2.76836	7.31827	11.6522	11.319	1.52485	5.09878	6.31942	12.9363
2.9152	7.51096	11.8449	11.3832	1.52851	5.1057	6.31942	13.8355
3.04575	7.76788	12.1661	11.5117	1.53763	5.17292	6.38365	14.2851
3.31658	8.15326	12.5514	11.5117	1.54774	5.20329	6.44788	14.7347
3.38382	8.28172	12.8726	11.6402	1.5652	5.22065	6.51211	15.4412
3.49671	8.60287	13.3222	11.7686	1.5867	5.23826	6.7048	15.5697
	8.98825	14.7353	11.8971	1.59345	5.26716	6.7048	15.8909
	9.24518	16.7264	11.8971	1.59385	5.29151	6.76903	17.5608
	9.24518	16.7906	12.0255	1.60249	5.29227	6.76903
	9.75902		12.0255	1.62304	5.3731	6.76903
	10.0802		12.2825	1.62465	5.38226	6.83326
	10.2086		12.3467	1.64845	5.48548	7.15441
			12.5394	1.65303	5.53557	7.41134
			12.9248	1.66708	5.56356	7.41134
			13.1174	1.68429	5.60554	7.41134
			13.1817	1.69363	5.62753	7.60403
			13.1817	1.74721	5.64936	7.60403
			13.2459	1.7585	5.72842	7.66826
			13.3744	1.84538	5.80538	7.73249
			13.3744	1.84781	5.80813	7.86095
			13.5028	1.85614	5.88896	8.11787
			14.2094	1.85793	5.91659	8.11787
			14.5305	1.85914	6.10343	8.11787
			14.7232	1.86999	6.10378	8.11787
			14.9159	1.88942	6.11473	8.1821
			14.9801	1.94595	6.20379	8.1821
			15.0443	1.96313	6.33226	8.1821
			15.1086	2.02497	6.33226	8.24633
			15.1728	2.04402	6.52495	8.31056
			15.3013	2.06292	6.52495	8.56748
			15.494	2.06788	6.78187	8.8244
			15.8151	2.08335	6.78187	8.88863
			15.8793	2.09461	6.78187	9.08132
			16.5216	2.1208	6.8461	9.14555
			16.7143	2.16147	7.16725	9.14555
			16.7143	2.21756	7.23148	9.20978
			17.2924	2.23224	7.4884	9.40247
			17.4851	2.26168	7.4884	9.4667
			17.4851	2.29245	7.4884	9.65939
			17.5493	2.37281	7.61686	9.85208
			17.6136	2.3783	7.74532	9.85208
			17.8062	2.38023	8.00224	9.91631
			17.8062	2.38727	8.06647	9.91631
			17.9347	2.39282	8.32339	9.98054
			18.5128	2.44387	8.51608	10.2375
			18.7697	2.5327	8.51608	10.4302
			18.8982	2.69075	8.58031	10.6871
			19.0266	2.72726	8.83723	10.7513
			19.0908	2.73146	9.09415	10.7513
			19.3478	3.40379	9.22261	11.0725
			19.3478	3.83522	9.22261	11.2651
			20.7608		9.80068	11.779
			20.8251		9.80068	12.2928
					11.4064	12.2928
						12.4213
						12.4213
						12.4855
						12.9994
						12.9994
						14.4124
						15.8897

## Sheet: Figure 4e
Figure 4e. Chromatin-bound DD-MCM3 intensity.
control				+ 5-Ph-IAA
G1/S	S	G2	next G1	G1/S	S	G2	next G1
-0.040745	-0.0259912	-0.0358051	0.925782	-0.0426305	0.106271	-0.033015	0.0313756
-0.012983	-0.0232212	-0.0201223	0.92891	-0.0294792	0.137853	-0.0202395	0.0631955
0.0285269	-0.0154702	-0.000651077	0.929111	-0.0276616	0.157817	0.0402865	0.119078
0.0412095	-0.0140718	0.0218872	0.931118	-0.0272942	0.192024	0.0685497	0.150613
0.0784623	-0.00540528	0.0232254	0.9403	-0.0183297	0.219449	0.0879666	0.1847
0.116771	-0.00286206	0.0311337	0.946919	-0.0122985	0.22631	0.0981419	0.209377
0.117249	0.0201817	0.0387667	0.948176	-0.00740789	0.236232	0.163604	0.251657
0.127045	0.0853689	0.0478525	0.973151	-0.000610908	0.240985	0.182748	0.281726
0.164318	0.0968641	0.0570186	0.975724	0.00347883	0.280731	0.203278	0.288578
0.167629	0.118597	0.0643512	0.983526	0.00927911	0.292602	0.223463	0.290357
0.190096	0.12119	0.0662584	0.993542	0.00979378	0.298254	0.231938	0.3298
0.199124	0.136034	0.0678627	0.99557	0.012142	0.329926	0.240106	0.331146
0.223852	0.151497	0.10712	1.00341	0.0327078	0.344447	0.245295	0.33524
0.226786	0.161968	0.119054	1.00369	0.0377893	0.349308	0.251729	0.336128
0.249215	0.175897	0.127956	1.01509	0.040222	0.355466	0.276951	0.341262
0.260807	0.192716	0.129055	1.02311	0.0432883	0.382455	0.283532	0.375954
0.276968	0.192987	0.158454	1.0243	0.043695	0.424543	0.293709	0.386928
0.290599	0.195301	0.171868	1.02434	0.0457478	0.429577	0.298434	0.39007
0.294366	0.203143	0.175234	1.02463	0.0460708	0.45566	0.300358	0.391638
0.298338	0.225288	0.179084	1.0353	0.0507564	0.470763	0.300927	0.399872
0.301898	0.226082	0.181743	1.03793	0.0516242	0.483906	0.315426	0.427848
0.310539	0.249332	0.206813	1.03946	0.0525707	0.485338	0.322503	0.45412
0.331152	0.26974	0.214099	1.04924	0.0540637	0.495303	0.336286	0.477398
0.343157	0.279543	0.216871	1.05127	0.0644935	0.500806	0.349001	0.488326
0.349963	0.280972	0.231472	1.06528	0.0693389	0.503515	0.351598	0.498081
0.3586	0.28337	0.234539	1.06851	0.081696	0.504739	0.352237	0.509894
0.37085	0.285627	0.242935	1.07046	0.083753	0.520255	0.359538	0.512655
0.377537	0.286402	0.252119	1.07513	0.0892419	0.528288	0.359735	0.516422
0.392757	0.294351	0.258044	1.07575	0.0939049	0.558341	0.363961	0.522615
0.398361	0.298879	0.270333	1.08449	0.100164	0.564474	0.367085	0.529276
0.40043	0.301772	0.270687	1.0932	0.100709	0.581006	0.370051	0.546084
0.400963	0.306477	0.27694	1.09593	0.104688	0.5813	0.371687	0.558644
0.402604	0.320069	0.278567	1.11394	0.104866	0.625895	0.382974	0.562348
0.404757	0.32041	0.280402	1.12302	0.10657	0.632545	0.383495	0.578552
0.412583	0.324775	0.285103	1.13203	0.11477	0.637062	0.384654	0.580916
0.412951	0.328093	0.307273	1.13605	0.121829	0.653551	0.394134	0.582001
0.416107	0.330738	0.317307	1.13777	0.136546	0.668225	0.394852	0.590133
0.422324	0.336038	0.324961	1.14044	0.138461	0.66903	0.408709	0.598427
0.423729	0.359598	0.33056	1.14151	0.146709	0.672135	0.419972	0.600962
0.43111	0.361249	0.330711	1.14267	0.165889	0.6842	0.421214	0.60892
0.431823	0.368658	0.332429	1.14374	0.169305	0.69908	0.421499	0.608956
0.475968	0.371953	0.335369	1.15426	0.177382	0.703138	0.422107	0.612656
0.490707	0.376676	0.33622	1.16765	0.179305	0.714626	0.424412	0.632573
0.491639	0.385643	0.338163	1.18063	0.183268	0.719621	0.441179	0.64139
0.500331	0.391263	0.343943	1.18308	0.188538	0.725411	0.44739	0.642962
0.50364	0.400246	0.351772	1.18375	0.193335	0.732526	0.453291	0.661274
0.513679	0.400525	0.352511	1.18538	0.19621	0.748528	0.459934	0.667621
0.517672	0.421162	0.357168	1.205	0.203179	0.749957	0.47007	0.670402
0.520104	0.424847	0.358565	1.23466	0.205502	0.761472	0.473274	0.671184
0.550552	0.425956	0.359318	1.24215	0.208184	0.767194	0.513513	0.681117
0.556517	0.42936	0.361459	1.24286	0.208916	0.775759	0.518442	0.681242
0.560588	0.435902	0.364293	1.24378	0.210892	0.778259	0.523473	0.689327
0.561575	0.438869	0.373275	1.25503	0.211447	0.78141	0.531697	0.689343
0.577737	0.440671	0.38391	1.26729	0.212159	0.796434	0.54022	0.691534
0.587076	0.447134	0.3883	1.26953	0.215888	0.797271	0.543383	0.693612
0.592319	0.448533	0.388843	1.27441	0.225401	0.807673	0.554216	0.700781
0.59573	0.450293	0.396783	1.27743	0.234129	0.807881	0.558852	0.701993
0.599076	0.450708	0.398293	1.27897	0.234505	0.812814	0.560235	0.70597
0.602804	0.450723	0.411028	1.29085	0.244802	0.814226	0.567032	0.706158
0.605844	0.450929	0.415545	1.29111	0.245211	0.840386	0.572601	0.71182
0.613906	0.466296	0.418746	1.31886	0.248907	0.849365	0.573368	0.712443
0.616822	0.468284	0.42758	1.32679	0.258481	0.850354	0.576404	0.720292
0.625792	0.486681	0.427852	1.33061	0.268602	0.855158	0.581508	0.720522
0.633648	0.496487	0.430565	1.33362	0.271488	0.876234	0.583309	0.725629
0.647744	0.497831	0.433264	1.33594	0.276892	0.877577	0.587542	0.73067
0.649158	0.4995	0.438372	1.35533	0.277089	0.884454	0.590398	0.748926
0.653317	0.500054	0.44869	1.3675	0.278849	0.884878	0.592414	0.760003
0.654697	0.503207	0.451263	1.37901	0.284035	0.888205	0.592811	0.760412
0.655462	0.50784	0.452426	1.38173	0.289385	0.888444	0.60978	0.762647
0.658718	0.509891	0.465989	1.41566	0.290416	0.890837	0.620223	0.787835
0.65925	0.510529	0.473068	1.4175	0.292859	0.894729	0.624309	0.802545
0.659432	0.518317	0.480665	1.4178	0.293971	0.914942	0.627687	0.809007
0.67094	0.523477	0.480962	1.42782	0.294846	0.917441	0.627816	0.810825
0.680038	0.525317	0.485	1.42888	0.308845	0.918256	0.632237	0.819151
0.685302	0.526844	0.486516	1.43257	0.324465	0.919693	0.640201	0.822721
0.696131	0.528909	0.494091	1.44268	0.331413	0.924142	0.644575	0.84157
0.696464	0.533638	0.506209	1.4447	0.351584	0.926313	0.644832	0.843075
0.698338	0.534057	0.511013	1.44488	0.355834	0.931379	0.645544	0.844266
0.698419	0.536345	0.511572	1.46346	0.357598	0.93329	0.646459	0.869448
0.701336	0.537605	0.514644	1.46775	0.371871	0.935101	0.650093	0.869577
0.708095	0.55634	0.521445	1.47101	0.381297	0.946302	0.652283	0.873276
0.729616	0.568824	0.524346	1.47823	0.390378	0.960902	0.653184	0.878204
0.729761	0.571617	0.526996	1.48061	0.390682	0.970841	0.653654	0.882568
0.733136	0.588266	0.530933	1.49466	0.397842	0.970939	0.653938	0.889617
0.737104	0.590871	0.531574	1.49925	0.399478	0.971313	0.657724	0.889742
0.739404	0.593313	0.548276	1.50387	0.407778	0.982769	0.661493	0.891463
0.753309	0.597671	0.562657	1.50414	0.420382	0.984728	0.673977	0.894616
0.759173	0.619923	0.567651	1.50511	0.432323	0.987397	0.676567	0.911539
0.764544	0.625063	0.568079	1.51143	0.442765	0.990882	0.683907	0.911543
0.76607	0.636132	0.568396	1.52139	0.444231	1.00188	0.687455	0.912133
0.767661	0.644028	0.57418	1.52223	0.445235	1.00209	0.700397	0.913223
0.768716	0.645444	0.575336	1.54176	0.461656	1.00711	0.702531	0.935783
0.780104	0.651716	0.579014	1.54184	0.463726	1.0107	0.720274	0.936479
0.782145	0.657884	0.59467	1.5475	0.464556	1.01322	0.724558	0.937963
0.792094	0.661397	0.595655	1.57175	0.465236	1.02203	0.73388	0.938013
0.794682	0.672548	0.596109	1.57255	0.465726	1.02746	0.734516	0.94511
0.797444	0.677817	0.596723	1.58426	0.467671	1.03183	0.734911	0.945547
0.799396	0.681096	0.603872	1.59699	0.467772	1.05066	0.743318	0.945842
0.808117	0.682376	0.606404	1.60533	0.471656	1.05395	0.745869	0.94626
0.811328	0.6855	0.612976	1.60647	0.474556	1.06081	0.754273	0.970897
0.812281	0.688039	0.613412	1.60843	0.486337	1.06271	0.758247	0.971747
0.813256	0.688584	0.614411	1.61142	0.486337	1.066	0.765035	0.972346
0.816122	0.688841	0.617126	1.6131	0.491832	1.06682	0.776468	0.973457
0.816454	0.691906	0.63187	1.61318	0.494834	1.06806	0.779841	0.991712
0.816747	0.692178	0.637025	1.61783	0.496368	1.07183	0.780155	0.991732
0.820146	0.696424	0.64364	1.61952	0.497396	1.07566	0.785196	0.992112
0.820539	0.709614	0.6437	1.62038	0.563966	1.07806	0.78866	0.992832
0.829224	0.711083	0.658156	1.62838	0.573948	1.08004	0.793236	1.00129
0.837944	0.714223	0.671774	1.62972	0.574014	1.0804	0.794543	1.00219
0.842648	0.716885	0.687978	1.63083	0.575089	1.0819	0.81932	1.00421
0.852867	0.717303	0.700695	1.63413	0.575116	1.08385	0.825088	1.00609
0.853959	0.719946	0.706842	1.63511	0.576992	1.08518	0.826511	1.00768
0.860467	0.721477	0.708953	1.63766	0.577984	1.09011	0.834832	1.00909
0.863746	0.724816	0.714898	1.64292	0.585346	1.09133	0.836305	1.00948
0.87725	0.725093	0.720541	1.64499	0.597495	1.09826	0.848929	1.01506
0.884161	0.727136	0.729792	1.65915	0.598495	1.10449	0.850223	1.01601
0.889366	0.737799	0.731645	1.66057	0.610234	1.10653	0.856374	1.02314
0.895425	0.740107	0.736722	1.67986	0.610235	1.10741	0.856631	1.02612
0.898257	0.740339	0.738635	1.68449	0.613716	1.11081	0.856969	1.02818
0.905269	0.741797	0.744171	1.68548	0.625711	1.11331	0.85777	1.03005
0.916538	0.744836	0.746978	1.70243	0.627731	1.12368	0.86472	1.0417
0.917128	0.749327	0.749464	1.70904	0.634846	1.12616	0.865811	1.0434
0.919112	0.750859	0.749777	1.71182	0.638539	1.12846	0.880525	1.0463
0.919632	0.75403	0.749982	1.71235	0.639016	1.12868	0.885117	1.04906
0.921046	0.754444	0.753121	1.71334	0.639175	1.12939	0.885786	1.05011
0.929122	0.757557	0.756594	1.71661	0.641554	1.1475	0.886048	1.0591
0.933793	0.761882	0.793892	1.71885	0.663429	1.16693	0.886601	1.05924
0.933795	0.76343	0.796274	1.72618	0.664129	1.16867	0.892593	1.06319
0.935219	0.764144	0.797728	1.73999	0.678924	1.1697	0.896077	1.06868
0.936961	0.764939	0.802561	1.74133	0.679125	1.1718	0.908151	1.07244
0.947112	0.76664	0.804028	1.74454	0.695751	1.17239	0.911271	1.08347
0.956902	0.76719	0.804569	1.7649	0.696151	1.17444	0.937237	1.09133
0.966609	0.767956	0.81907	1.76536	0.711933	1.17534	0.942823	1.10635
0.969048	0.769819	0.822456	1.76885	0.712333	1.18261	0.954629	1.11621
0.971457	0.773824	0.828314	1.77388	0.713996	1.18537	0.957906	1.1242
0.981653	0.779585	0.833208	1.77809	0.714556	1.19223	0.959841	1.14516
0.994057	0.780211	0.834636	1.78132	0.7148	1.19302	0.959896	1.15429
0.997288	0.78747	0.83528	1.79427	0.7151	1.19575	0.966204	1.15837
0.997651	0.793701	0.839624	1.79879	0.724107	1.19762	0.970545	1.16006
0.998978	0.807736	0.844387	1.81035	0.727407	1.19968	0.972566	1.16536
1.00169	0.808883	0.855591	1.82553	0.739325	1.20768	0.978182	1.18464
1.01381	0.813889	0.86778	1.84825	0.740328	1.20916	0.979307	1.2025
1.02352	0.82018	0.871252	1.85351	0.742276	1.21044	0.983189	1.21591
1.04237	0.822718	0.875378	1.86814	0.74454	1.21058	0.987672	1.2221
1.04604	0.824464	0.877957	1.87006	0.74544	1.21276	0.99244	1.22884
1.0594	0.824896	0.880325	1.8717	0.748756	1.21459	0.995861	1.23174
1.06156	0.825303	0.885034	1.89349	0.751876	1.22578	0.997283	1.23526
1.06833	0.831291	0.887974	1.9011	0.752965	1.2281	0.999969	1.2382
1.07347	0.832524	0.915174	1.90685	0.777719	1.23272	1.00076	1.24089
1.07972	0.833165	0.918934	1.92065	0.782585	1.23344	1.00245	1.24835
1.10619	0.834089	0.921873	1.93324	0.786068	1.23871	1.00307	1.26731
1.10668	0.84332	0.923176	1.94395	0.807705	1.24124	1.00703	1.26959
1.10736	0.852334	0.923372	1.95751	0.808336	1.24431	1.02063	1.27071
1.1204	0.860358	0.923446	1.96134	0.81497	1.25171	1.02132	1.27328
1.12061	0.861445	0.929622	1.96729	0.819804	1.25862	1.03928	1.28472
1.12483	0.87002	0.935382	1.96741	0.842517	1.25927	1.04004	1.28605
1.12656	0.875092	0.935901	1.98073	0.849061	1.25938	1.04235	1.29912
1.12707	0.875306	0.939073	1.98376	0.860064	1.29259	1.0479	1.30459
1.12998	0.891794	0.9435	1.98491	0.873996	1.29934	1.04862	1.31554
1.13305	0.894899	0.950535	1.99095	0.894694	1.31827	1.05089	1.31623
1.13605	0.920039	0.950692	2.0061	0.92311	1.32418	1.05511	1.33989
1.13763	0.926127	0.956031	2.00738	0.930927	1.33093	1.05696	1.34047
1.14495	0.9363	0.958324	2.01697	0.932739	1.33575	1.0589	1.3466
1.14657	0.958598	0.959363	2.02305	0.945991	1.34818	1.08822	1.36481
1.14839	0.958877	0.962625	2.02517	0.947487	1.34917	1.09161	1.38184
1.14901	0.959903	0.964644	2.03615	0.950924	1.35104	1.09904	1.40589
1.15135	0.967872	0.970865	2.04181	0.958796	1.35313	1.10174	1.40658
1.15456	0.970266	0.972214	2.04518	0.96435	1.35372	1.10189	1.43241
1.16738	0.971707	0.973287	2.08354	0.968321	1.37132	1.10613	1.43685
1.17347	0.986231	0.977151	2.08808	0.988038	1.37237	1.11236	1.44145
1.17706	0.989652	0.977859	2.10005	1.00876	1.37299	1.11297	1.45956
1.18219	0.991225	0.980281	2.11616	1.04217	1.38515	1.12425	1.46625
1.2016	0.992357	0.980942	2.11779	1.06291	1.39964	1.12679	1.46848
1.20621	1.00331	0.981266	2.12203	1.07177	1.40373	1.13423	1.47055
1.20724	1.00533	0.991382	2.12874	1.11464	1.40868	1.13516	1.50119
1.21188	1.02069	0.998602	2.1306	1.11597	1.41793	1.15144	1.50716
1.21789	1.0273	0.999056	2.14908	1.13443	1.42312	1.1574	1.51444
1.22055	1.02971	1.00171	2.15068	1.14758	1.42909	1.15788	1.5163
1.22218	1.03438	1.00592	2.15724	1.16299	1.44327	1.16242	1.51867
1.22614	1.04475	1.01531	2.16196	1.16337	1.45266	1.17292	1.5399
1.23637	1.04643	1.01836	2.16403	1.19911	1.47456	1.17436	1.55952
1.23982	1.04673	1.02318	2.16722	1.21055	1.47493	1.18721	1.56401
1.27596	1.04979	1.02868	2.17463	1.21056	1.47887	1.20123	1.56779
1.28438	1.06218	1.03014	2.187	1.23028	1.48329	1.21204	1.57535
1.28609	1.06484	1.03133	2.18993	1.24681	1.48364	1.21901	1.57551
1.29425	1.07756	1.03969	2.19221	1.24957	1.48741	1.2229	1.58949
1.29484	1.08449	1.05112	2.21236	1.26076	1.49034	1.2253	1.61742
1.29529	1.08537	1.05671	2.21972	1.30515	1.49191	1.22776	1.62953
1.3123	1.09263	1.06703	2.22604	1.33269	1.49206	1.23117	1.63127
1.31501	1.09696	1.06916	2.23108	1.35152	1.49753	1.23773	1.64756
1.32399	1.10548	1.0822	2.29138	1.39378	1.50149	1.24944	1.68432
1.32795	1.11044	1.09809	2.29739	1.40531	1.50251	1.25619	1.69498
1.33351	1.11083	1.10688	2.33319	1.42155	1.50381	1.25681	1.69897
1.33647	1.11268	1.11579	2.34141	1.49299	1.51897	1.26235	1.70116
1.34446	1.11904	1.11916	2.34787	1.4953	1.5345	1.26451	1.70345
1.3475	1.12321	1.12154	2.35058	1.57959	1.54028	1.26974	1.74057
1.35237	1.13328	1.12571	2.35618	1.66615	1.54356	1.2738	1.7507
1.35621	1.13555	1.12906	2.36611	1.69326	1.54445	1.30043	1.8435
1.36568	1.14414	1.13535	2.37405	1.70941	1.54996	1.32866	1.87007
1.36759	1.15384	1.13811	2.3746	1.8295	1.55273	1.3392	1.94736
1.38154	1.17252	1.15545	2.37885	1.83247	1.55302	1.35482	1.98871
1.38221	1.18748	1.15567	2.3973	1.92468	1.55519	1.38367	1.99572
1.38428	1.18897	1.15655	2.39851	2.01161	1.56052	1.39175	2.19626
1.39564	1.19347	1.16708	2.40002		1.57033	1.41949	2.29343
1.3972	1.19377	1.17156	2.4037		1.57404	1.44615
1.39867	1.19512	1.1777	2.4068		1.58866	1.46207
1.42734	1.20919	1.19389	2.41288		1.59947	1.47117
1.4405	1.2113	1.19939	2.41312		1.60345	1.4737
1.4431	1.21283	1.2017	2.42015		1.62832	1.47838
1.47518	1.23068	1.20887	2.42228		1.634	1.5211
1.4874	1.2402	1.22493	2.43722		1.65161	1.55759
1.4932	1.24933	1.28705	2.44652		1.67771	1.56424
1.5147	1.26019	1.29492	2.46599		1.69816	1.5953
1.52889	1.26207	1.29805	2.48859		1.72062	1.60299
1.54282	1.26367	1.36022	2.48907		1.72841	1.60659
1.55471	1.29253	1.42212	2.49549		1.73595	1.61273
1.55932	1.31458	1.46761	2.50233		1.74459	1.6807
1.58362	1.32115	1.47228	2.52925		1.76736	1.72678
1.58795	1.32377	1.49049	2.53112		1.77371	1.74114
1.60341	1.3681	1.53625	2.53138		1.77713	1.78111
1.61582	1.37283	1.7192	2.54466		1.80988	1.88322
1.6213	1.38548	1.86227	2.54567		1.81238	2.0144
1.63859	1.4004	1.98233	2.55228		1.8318	2.07427
1.66075	1.43599	1.99959	2.55381		1.83987	2.61225
1.66117	1.44196	2.49617	2.56328		1.8497
1.66474	1.44638	2.49632	2.58279		1.85045
1.67073	1.49331		2.59112		1.87427
1.68091	1.50671		2.59627		1.88125
1.68324	1.5084		2.59667		1.88515
1.68871	1.52851		2.60284		1.8986
1.69886	1.53131		2.6073		1.91664
1.70419	1.56187		2.60904		1.9261
1.70976	1.58973		2.61956		1.94807
1.72888	1.59696		2.62366		1.96251
1.74022	1.60222		2.62704		1.96342
1.74056	1.6411		2.62759		1.96548
1.75235	1.65386		2.65116		2.01627
1.7658	1.66412		2.66281		2.14359
1.78101	1.66784		2.6669		2.23385
1.78667	1.69633		2.6671		2.31541
1.78817	1.71241		2.67082		2.36502
1.81221	1.78847		2.67144		2.36763
1.82248	1.85067		2.67879		2.38009
1.82442	1.88034		2.70336		2.54018
1.82779	1.88052		2.71842
1.88541	1.92384		2.76925
1.89723	1.92412		2.77897
1.89831	1.95752		2.80838
1.9292	1.97767		2.8162
1.95761	2.02728		2.8198
1.97042	2.24171		2.83431
2.04931	2.30517		2.83585
2.05268			2.83944
2.0736			2.84079
2.07879			2.85543
2.08223			2.86188
2.08844			2.87434
2.14396			2.87789
2.17566			2.87831
2.29043			2.88113
			2.89122
			2.9243
			2.93881
			2.96792
			2.97619
			2.9893
			3.04062
			3.04206
			3.06087
			3.07092
			3.07319
			3.08169
			3.08716
			3.09462
			3.09837
			3.09947
			3.10737
			3.11942
			3.13457
			3.13654
			3.16486
			3.16866
			3.17443
			3.19148
			3.19907
			3.21347
			3.22716
			3.23239
			3.2622
			3.28
			3.35659
			3.36517
			3.39725
			3.42553
			3.44601
			3.45645
			3.50776
			3.60959
			3.61951
			3.64238
			3.66497
			3.66763
			3.73826
			3.78827
			3.9058
			3.93775
			3.95697
			3.96267
			3.9723
			4.00133
			4.04666
			4.04773
			4.06059
			4.09688
			4.12331
			4.22385
			4.38842
			4.41116
			4.52615
			4.54144
			4.55131
			4.75566
			4.79289
			4.95146
			5.01158
			5.01738
			5.10126
			5.40169

## Sheet: Figure 5a
Figure 5a. Growth curves of cells after the depletion of MCMBP.
		Parental
	days	0	2	4	6	8
MCMBP(+)	#1	9.7	9.9	10	11.1	10.6	×105 cells
	#2	9.7	11.7	10.6	9.7	9.8
	#3	9.7	10	10.5	11.2	11
MCMBP(−)	#1	9.7	11	10.4	11.2	11.1
	#2	9.7	10.5	10	10.4	10.7
	#3	9.7	10.2	10.7	11	10.9
		MCMBP-mAC p53+/+
	days	0	2	4	6	8
MCMBP(+)	#1	11.5	11.9	11.1	11.3	11.5	×105 cells
	#2	11.5	11.4	10.5	11.1	12.3
	#3	11.5	11.2	11.2	10.8	11.6
MCMBP(−)	#1	11.5	9.4	6.5	4	1.16
	#2	11.5	8.7	7.7	3.8	1.27
	#3	11.5	9	6.5	3.7	1.26
		MCMBP-mAC p53−/−
	days	0	2	4	6	8
MCMBP(+)	#1	9.4	9.4	9.3	9.9	9.5	×105 cells
	#2	9.4	9	8.9	9.3	9.7
	#3	9.4	9.4	9.3	10.1	10.7
MCMBP(−)	#1	9.4	8.4	7.1	4.3	2.8
	#2	9.4	8.2	8.1	4.9	2.38
	#3	9.4	8.6	8	5	2.45

## Sheet: Figure 5c
Figure 5c. Foci formation of 53BP1.
Parental		MCMBP-mAC p53+/+		MCMBP-mAC p53−/−
MCMBP(+)	MCMBP(−)	MCMBP(+)	MCMBP(−)	MCMBP(+)	MCMBP(−)
0	0	0	0	0	0
0	0	0	0	0	0
0	0	0	0	0	0
0	0	0	0	0	0
0	0	0	0	0	0
0	0	0	0	0	1
0	0	0	0	0	1
0	0	0	0	0	1
0	0	0	0	0	1
0	0	0	0	0	1
0	0	0	0	0	2
0	0	0	0	0	2
0	0	0	0	0	2
0	0	0	0	0	2
0	0	0	0	0	2
0	0	0	0	0	2
0	0	0	0	0	2
0	0	0	0	0	2
0	0	0	0	0	2
0	0	0	0	0	2
0	0	0	0	0	2
0	0	0	0	0	2
0	0	0	0	0	2
0	0	0	0	0	2
0	0	0	0	0	2
0	0	0	0	0	2
0	0	0	0	0	2
0	0	0	0	0	3
0	0	0	0	0	3
0	0	0	0	0	3
0	0	0	0	0	3
0	0	0	0	0	3
0	0	0	0	0	3
0	0	0	0	0	3
0	0	0	0	0	3
0	0	0	0	0	3
0	0	0	1	0	3
0	0	0	1	0	3
0	0	0	1	0	3
0	0	0	1	0	3
0	0	0	1	0	3
0	0	0	1	0	3
0	0	0	1	0	3
0	0	0	1	0	3
0	0	0	1	0	3
0	0	0	1	0	3
0	0	0	1	0	3
0	0	0	1	0	3
0	0	0	1	0	3
0	0	0	1	0	3
0	0	0	1	0	4
0	0	0	1	0	4
0	0	0	1	0	4
0	0	0	1	0	4
0	0	0	1	0	4
0	0	0	1	0	4
0	0	0	1	0	4
0	0	0	1	0	4
0	0	0	1	0	4
0	0	0	1	0	4
0	0	0	1	0	4
0	0	0	1	0	4
0	0	0	1	0	4
0	0	0	1	0	4
0	0	0	1	0	4
0	0	0	1	0	4
0	0	0	1	0	4
0	0	0	1	0	4
0	0	0	1	0	4
0	0	0	1	1	4
0	0	0	1	1	4
0	0	0	1	1	4
0	0	0	1	1	4
0	0	0	1	1	4
0	0	0	1	1	4
0	0	0	1	1	4
0	0	0	1	1	4
0	0	0	1	1	4
0	0	1	1	1	4
0	0	1	1	1	4
0	0	1	1	1	4
0	0	1	1	1	4
1	0	1	1	1	4
1	0	1	1	1	5
1	0	1	1	1	5
1	0	1	1	1	5
1	0	1	1	1	5
1	0	1	2	1	5
1	0	1	2	1	5
1	0	1	2	1	5
1	0	1	2	1	5
1	0	1	2	1	5
1	1	1	2	1	5
1	1	1	2	1	5
1	1	1	2	1	5
1	1	1	2	1	5
1	1	1	2	1	5
1	1	1	2	1	5
1	1	1	2	1	5
1	1	1	2	1	5
1	1	1	2	1	5
1	1	1	2	1	5
1	1	1	2	1	5
1	1	1	2	1	5
1	1	1	2	1	5
1	1	1	2	1	5
1	1	1	2	1	5
1	1	1	2	1	5
1	1	1	2	1	5
1	1	1	2	1	5
1	1	1	2	1	5
1	1	1	2	1	5
1	1	1	2	1	6
1	1	1	2	1	6
1	1	1	2	1	6
1	1	1	2	1	6
1	1	1	2	1	6
1	1	1	2	1	6
1	1	1	2	1	6
1	1	1	2	1	6
1	1	1	2	1	6
1	1	1	2	1	6
1	1	1	2	1	6
1	1	1	2	1	6
1	1	1	2	1	6
1	1	1	2	1	6
1	1	1	2	1	6
1	1	1	2	1	6
1	1	1	2	1	7
1	1	1	2	1	7
1	1	1	2	1	7
1	1	1	2	1	7
1	1	1	2	1	7
1	1	1	2	2	7
1	1	1	2	2	7
1	1	1	3	2	7
1	1	1	3	2	7
1	1	1	3	2	7
1	1	1	3	2	7
1	1	1	3	2	7
1	1	1	3	2	7
1	1	1	3	2	7
1	1	1	3	2	7
1	1	1	3	2	7
1	1	1	3	2	7
1	1	1	3	2	7
1	1	1	3	2	8
1	1	1	3	2	8
1	2	1	3	2	8
1	2	1	3	2	8
2	2	1	3	2	8
2	2	1	3	2	8
2	2	1	3	2	8
2	2	1	3	2	8
2	2	2	3	2	8
2	2	2	3	2	8
2	2	2	3	2	8
2	2	2	3	2	8
2	2	2	3	2	8
2	2	2	3	2	8
2	2	2	3	2	8
2	2	2	3	2	8
2	2	2	3	2	8
2	2	2	3	2	9
2	2	2	3	2	9
2	2	2	3	2	9
2	2	2	3	2	9
2	2	2	3	2	9
2	2	2	3	2	9
2	2	2	3	2	9
2	2	2	3	2	10
2	2	2	3	2	10
2	2	2	3	2	10
2	2	2	3	2	10
2	2	2	4	2	10
2	2	2	4	2	10
2	2	2	4	2	11
2	3	2	4	2	11
2	3	2	4	2	11
2	3	2	4	3	11
2	3	2	4	3	11
2	3	2	4	3	11
2	3	2	4	3	11
2	3	2	4	3	11
3	3	2	4	3	11
3	3	2	4	3	12
3	3	2	4	3	12
3	3	2	4	3	12
3	3	2	4	3	12
3	3	2	4	3	12
3	3	2	5	3	12
3	3	2	5	3	12
3	3	2	5	3	13
3	3	2	5	3	13
3	4	2	5	3	14
3	4	2	5	3	14
3	4	2	7	3	14
3	4	2	7	3	14
3	4	2	7	3	15
3	4	2	7	3	15
3	4	2	8	3	15
3	5	3	8	3	15
3	5	3	9	3	16
3	5	3		3	17
3	5	3		3	17
3	5	3		3	17
4	5	3		3	18
4	5	3		3	19
4	6	3		3	20
4	6	3		3	20
4	6	3		4	20
4	6	3		4	20
4	6	3		4	21
4	6	3		4
4	6	3		4
4	7	3		4
4	9	3		4
4		3		4
5		3		5
5		3		5
5		4		5
5		4		5
5		4		5
6		4		5
6		4		5
6		4		5
6		4		6
6		4		6
6		4		7
7		4		9
8		4
8		4
		4
		4
		4
		4
		5
		5
		5
		5
		6
		6
		6
		8

[truncated: 6 more sheets: Figure 5e, Figure 2-S1d, Figure 4-S2b, Figure 4-S2c, Figure 5-S1a, Figure 5-S1b]
